# Modeling of Oxygen Transport and Cellular Energetics Explains Observations on In Vivo Cardiac Energy Metabolism

Daniel A. Beard<sup>1,2\*</sup>

**1** Department of Physiology, Medical College of Wisconsin, Milwaukee, Wisconsin, United States of America, **2** Biotechnology and Bioengineering Center, Medical College of Wisconsin, Milwaukee, Wisconsin, United States of America

**Observations on the relationship between cardiac work rate and the levels of energy metabolites adenosine triphosphate (ATP), adenosine diphosphate (ADP), and phosphocreatine (CrP) have not been satisfactorily explained by theoretical models of cardiac energy metabolism. Specifically, the in vivo stability of ATP, ADP, and CrP levels in response to changes in work and respiratory rate has eluded explanation. Here a previously developed model of mitochondrial oxidative phosphorylation, which was developed based on data obtained from isolated cardiac mitochondria, is integrated with a spatially distributed model of oxygen transport in the myocardium to analyze data obtained from several laboratories over the past two decades. The model includes the components of the respiratory chain, the  $F_0F_1$ -ATPase, adenine nucleotide translocase, and the mitochondrial phosphate transporter at the mitochondrial level; adenylate kinase, creatine kinase, and ATP consumption in the cytoplasm; and oxygen transport between capillaries, interstitial fluid, and cardiomyocytes. The integrated model is able to reproduce experimental observations on ATP, ADP, CrP, and inorganic phosphate levels in canine hearts over a range of workload and during coronary hypoperfusion and predicts that cytoplasmic inorganic phosphate level is a key regulator of the rate of mitochondrial respiration at workloads for which the rate of cardiac oxygen consumption is less than or equal to approximately  $12 \mu\text{mol}$  per minute per gram of tissue. At work rates corresponding to oxygen consumption higher than  $12 \mu\text{mol min}^{-1} \text{g}^{-1}$ , model predictions deviate from the experimental data, indicating that at high work rates, additional regulatory mechanisms that are not currently incorporated into the model may be important. Nevertheless, the integrated model explains metabolite levels observed at low to moderate workloads and the changes in metabolite levels and tissue oxygenation observed during graded hypoperfusion. These findings suggest that the observed stability of energy metabolites emerges as a property of a properly constructed model of cardiac substrate transport and mitochondrial metabolism. In addition, the validated model provides quantitative predictions of changes in phosphate metabolites during cardiac ischemia.**

Citation: Beard DA (2006) Modeling of oxygen transport and cellular energetics explains observations on in vivo cardiac energy metabolism. *PLoS Comput Biol* 2(9): e107. DOI: 10.1371/journal.pcbi.0020107

## Introduction

Over 30 years ago, Neely et al. [1] showed that adenosine triphosphate (ATP), adenosine diphosphate (ADP), and adenosine monophosphate (AMP) concentrations are maintained at essentially constant concentrations with changes in cardiac work in the isolated perfused heart. Twenty years ago, Balaban et al. [2] observed that energetic phosphate concentrations measured in vivo using NMR spectroscopy remain effectively constant over a range of cardiac workloads. These observations contradicted earlier models of the control of mitochondrial metabolism, which assumed that the rate of oxidative phosphorylation was regulated primarily by the availability of ADP [3,4]. Specifically, the cytoplasmic ADP concentration and the ratio of creatine phosphate (CrP) to ATP concentration was found to be approximately constant over a range of workload and rates of oxygen consumption in canine hearts [2,5]. To date, a credible validated biophysical model of the in vivo regulation of oxidative phosphorylation that explains the observed phenomena has not been established. Such a model would provide a theoretical basis for understanding how mitochondrial metabolism is regulated in response to changing ATP turnover rate while

maintaining homeostatic concentrations of ATP, ADP, and CrP. Such a model would also form the basis of quantitative studies of the regulation of phosphate metabolites oxidative phosphorylation in the failing heart and other pathophysiological situations [6].

In this work, a detailed model of cardiac oxidative phosphorylation that was developed based on an extensive set of data obtained from isolated mitochondria [7] is

**Editor:** Peter Hunter, University of Auckland, New Zealand

**Received:** February 8, 2006; **Accepted:** July 10, 2006; **Published:** September 15, 2006

A previous version of this article appeared as an Early Online Release on July 10, 2006 (DOI: 10.1371/journal.pcbi.0020107.eor).

**DOI:** 10.1371/journal.pcbi.0020107

**Copyright:** © 2006 Daniel A. Beard. This is an open-access article distributed under the terms of the Creative Commons Attribution License, which permits unrestricted use, distribution, and reproduction in any medium, provided the original author and source are credited.

**Abbreviations:** ADP, adenosine diphosphate; AMP, adenosine monophosphate; ATP, adenosine triphosphate; CK, creatine kinase; CrP, creatine phosphate; IM, intermembrane; Pi, inorganic phosphate;  $S_{Mb}$ , oxymyoglobin saturation;  $V_{ATC}$ , rate of ATP consumption

\* To whom correspondence should be addressed. E-mail: dbeard@mcw.edu

## Synopsis

To function properly over a range of work rates, the heart must maintain its metabolic energy level within a range that is narrow relative to changes in the rate of energy utilization. Decades of observations have revealed that in cardiac muscle cells, the supply of adenosine triphosphate (ATP)—the primary currency of intracellular energy transfer—is controlled to maintain intracellular concentrations of ATP and related compounds within narrow ranges. Yet the development of a mechanistic understanding of this tight control has lagged behind experimental observation. This paper introduces a computational model that links ATP synthesis in a subcellular body called the mitochondrion with ATP utilization in the cytoplasm, and reveals that the primary control mechanism operating in the system is feedback of substrate concentrations for ATP synthesis. In other words, changes in the concentrations of the products generated by the utilization of ATP in the cell (adenosine diphosphate and inorganic phosphate) effect changes in the rate at which mitochondria utilize those products to resynthesize ATP.

integrated with an axially distributed model of oxygen transport and exchange with tissue [8]. The mitochondrial model includes the components of the respiratory chain, the  $F_0F_1$ -ATPase, adenine nucleotide translocase, and the mitochondrial phosphate transporter. The mitochondrial model is integrated with a model of ATP, ADP, AMP, and CrP metabolism in the cytoplasm, including the reactions of adenylate kinase, creatine kinase, and ATP consumption. Oxygen transport is governed by advection of blood in capillaries, passive permeation between blood and interstitial fluid and between interstitial fluid and cardiomyocytes, and metabolic consumption at Complex IV of the respiratory chain. An empiric relationship between cardiac perfusion and ATP consumption rate is determined by comparing model simulations to data published by Katz et al. [5]. The behavior of the resulting integrated model is compared to datasets published by Katz et al. [5], Portman et al. [9], and Zhang et al. [10], which report on in vivo changes in cardiac phosphate metabolites in response to changes in workload and to graded ischemia.

## Results

### Overview of Oxygen Transport

Oxygen transport and energetic metabolism in cardiac tissue are simulated using a three-region one dimensionally distributed model [8,11], illustrated in Figure 1. The model assumes that within the capillary, interstitial space, and cellular (myocyte) space, the concentrations of oxygen and other metabolites vary primarily along the length of the capillary. Advective transport is modeled in the capillary region; the interstitial and cellular spaces are assumed to be stagnant (nonflowing). The cellular region is further subdivided into cytoplasmic and mitochondrial compartments, as described below. The full set of model variables is listed in Table 1, along with a brief description of the variables and the units associated with each variable. Note that oxygen concentrations are expressed as mass per unit volume, while the other intracellular species are expressed as mass per unit water volume in a given region. Each variable in the model is a function of distance along the capillary  $x$  and time  $t$ .

A representative model-predicted steady-state oxygen

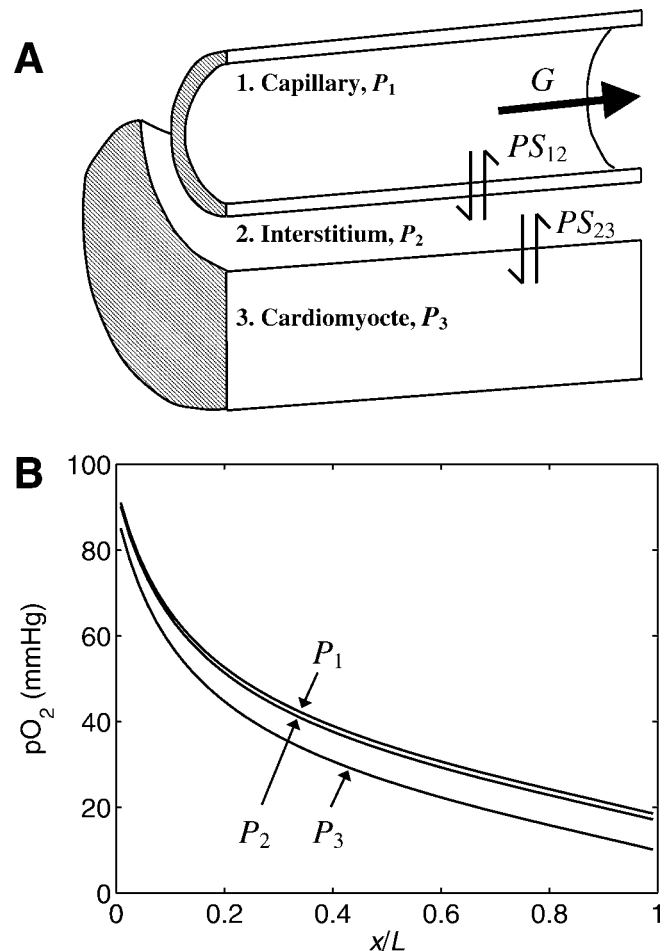

**Figure 1.** Axially Distributed Blood-Tissue Exchange Model for Oxygen Transport

(A) A three-region one dimensionally distributed model for oxygen transport is diagrammed. The three regions correspond to capillary, interstitium, and cell (myocyte). Blood flows in the capillary region. Oxygen is transported via passive permeation between the capillary, interstitial, and myocyte regions.

(B) Predicted capillary, interstitial, and cellular  $PO_2$  are plotted as functions of  $x/L$ , the normalized distance along the capillary. Simulation parameters are  $TPP = 15$  mM,  $G = 0.75$  ml  $min^{-1}$  (g of tissue) $^{-1}$ , and  $J_{ATC} = 0.45$  mmol  $s^{-1}$  (l cell) $^{-1}$ . The input arterial  $PO_2$  is assumed to be 100 mm Hg. The predicted rate of oxygen consumption and oxygen extraction are found to be  $5.3$   $\mu$ mol  $min^{-1}$  (g of tissue) $^{-1}$  and 76%, respectively.

DOI: 10.1371/journal.pcbi.0020107.g001

concentration profile is illustrated in Figure 1B, which plots the capillary, interstitial, and cellular  $PO_2$  as functions of  $x/L$ , the normalized distance along the capillary. Partial pressures decrease from the arterial ( $x = 0$ ) to the venous ( $x = L$ ) end of the capillary and decrease from the capillary region to the cellular region.

To obtain the results illustrated in Figure 1B, the total pool of exchangeable phosphate in the cell (see Equation 26 in Materials and Methods) was set to 15 mM, flow was set to  $G = 0.75$  ml  $min^{-1}$  (g of tissue) $^{-1}$ , and the rate of ATP consumption was set to  $J_{ATC} = 0.45$  mmol  $s^{-1}$  (l cell) $^{-1}$ . For all simulations, the input arterial  $PO_2$  was assumed to be 100 mm Hg. For these values, the rates of oxygen consumption and oxygen extraction were found to be  $5.3$   $\mu$ mol  $min^{-1}$  (g of

**Table 1.** Model Variables

| Variable              | Description                                                 | Units                                 |
|-----------------------|-------------------------------------------------------------|---------------------------------------|
| $C_{O,1}$             | Oxygen concentration in blood                               | mol (l blood) <sup>-1</sup>           |
| $C_{O,2}$             | Oxygen concentration in interstitial fluid                  | mol (l ISF) <sup>-1</sup>             |
| $C_{O,3}$             | Oxygen concentration in myocyte                             | mol (l cell) <sup>-1</sup>            |
| $P_1$                 | Oxygen partial pressure in blood                            | mm Hg                                 |
| $P_2$                 | Oxygen partial pressure in interstitial fluid               | mm Hg                                 |
| $P_3$                 | Oxygen partial pressure in myocyte                          | mm Hg                                 |
| $S_{Hb}$              | Hemoglobin saturation in red blood cells                    | unitless                              |
| $S_{Mb}$              | Myoglobin saturation                                        | unitless                              |
| $[H^+]_x$             | Concentration of H <sup>+</sup> ion in mito matrix          | mol (l matrix water) <sup>-1</sup>    |
| $[K^+]_x$             | Concentration of K <sup>+</sup> ion in mito matrix          | mol (l matrix water) <sup>-1</sup>    |
| $[Mg^{2+}]_x$         | Concentration of Mg <sup>2+</sup> ion in mito matrix        | mol (l matrix water) <sup>-1</sup>    |
| $[NADH]_x$            | Concentration of NADH in mito matrix                        | mol (l matrix water) <sup>-1</sup>    |
| $[NAD]_x$             | Concentration of NAD in mito matrix                         | mol (l matrix water) <sup>-1</sup>    |
| $[QH_2]_x$            | Concentration of reduced ubiquinol in mito matrix           | mol (l matrix water) <sup>-1</sup>    |
| $[Q]_x$               | Concentration of oxidized ubiquinol in mito matrix          | mol (l matrix water) <sup>-1</sup>    |
| $[ATP]_x$             | Concentration of total ATP in mito matrix                   | mol (l matrix water) <sup>-1</sup>    |
| $[ADP]_x$             | Concentration of total ADP in mito matrix                   | mol (l matrix water) <sup>-1</sup>    |
| $[mATP]_x$            | Concentration of Mg <sup>2+</sup> -bound ATP in mito matrix | mol (l matrix water) <sup>-1</sup>    |
| $[mADP]_x$            | Concentration of Mg <sup>2+</sup> -bound ADP in mito matrix | mol (l matrix water) <sup>-1</sup>    |
| $[Pi]_x$              | Concentration of Pi in mito matrix                          | mol (l matrix water) <sup>-1</sup>    |
| $[cytoC(red)^{2+}]_i$ | Concentration of reduced cytochrome c in IM space           | mol (l IM water) <sup>-1</sup>        |
| $[cytoC(ox)^{3+}]_i$  | Concentration of oxidized cytochrome c in IM space          | mol (l IM water) <sup>-1</sup>        |
| $[ATP]_i$             | Concentration of total ATP in IM space                      | mol (l IM water) <sup>-1</sup>        |
| $[ADP]_i$             | Concentration of total ADP in IM space                      | mol (l IM water) <sup>-1</sup>        |
| $[AMP]_i$             | Concentration of total AMP in IM space                      | mol (l IM water) <sup>-1</sup>        |
| $[mATP]_i$            | Concentration of Mg <sup>2+</sup> -bound ATP in IM space    | mol (l IM water) <sup>-1</sup>        |
| $[mADP]_i$            | Concentration of Mg <sup>2+</sup> -bound ADP in IM space    | mol (l IM water) <sup>-1</sup>        |
| $[Pi]_i$              | Concentration of Pi in IM space                             | mol (l IM water) <sup>-1</sup>        |
| $[Mg^{2+}]_i$         | Concentration of Mg <sup>2+</sup> ion in IM space           | mol (l IM water) <sup>-1</sup>        |
| $[ATP]_c$             | Concentration of total ATP in cytoplasm                     | mol (l cytoplasm water) <sup>-1</sup> |
| $[ADP]_c$             | Concentration of total ADP in cytoplasm                     | mol (l cytoplasm water) <sup>-1</sup> |
| $[AMP]_c$             | Concentration of total ADP in cytoplasm                     | mol (l cytoplasm water) <sup>-1</sup> |
| $[mATP]_c$            | Concentration of Mg <sup>2+</sup> -bound ATP in cytoplasm   | mol (l cytoplasm water) <sup>-1</sup> |
| $[mADP]_c$            | Concentration of Mg <sup>2+</sup> -bound ADP in cytoplasm   | mol (l cytoplasm water) <sup>-1</sup> |
| $[Mg^{2+}]_c$         | Concentration of free Mg <sup>2+</sup> ion in cytoplasm     | mol (l cytoplasm water) <sup>-1</sup> |
| $[Pi]_c$              | Concentration of Pi in cytoplasm                            | mol (l cytoplasm water) <sup>-1</sup> |
| $[CrP]_c$             | Concentration of creatine phosphate in cytoplasm            | mol (l cytoplasm water) <sup>-1</sup> |
| $[Cr]_c$              | Concentration of creatine in cytoplasm                      | mol (l cytoplasm water) <sup>-1</sup> |
| $\Delta\Psi$          | Mitochondrial membrane potential                            | mV                                    |

DOI: 10.1371/journal.pcbi.0020107.t001

tissue)<sup>-1</sup> and 76%, respectively, values which are consistent with a moderate rate of cardiac work [12,13].

### Relationship between Flow and ATP Consumption

To simulate the behavior of the model at different workloads, it is necessary to define a relationship between workload and coronary perfusion. In Katz et al. [5], cardiac flow and the rate of cardiac oxygen consumption,  $MVO_2$ , are measured under different conditions. Yet in the integrated model,  $MVO_2$  is not set as an input parameter;  $MVO_2$  is computed as a function of the rate of ATP consumption  $J_{ATC}$ . To determine a relationship between  $G$  and  $J_{ATC}$ , the model was fit to data from Tables 2, 3, and 4 of Katz et al. [5], which report  $G$  and  $MVO_2$  for paced hearts, hearts stimulated with epinephrine, and hearts stimulated with phenylephrine. For entry in these tables, the value of  $J_{ATC}$  was varied until the model-predicted  $MVO_2$  was equal to the given experimental measure. The resulting data are plotted in Figure 2A. The observed  $G$  and  $J_{ATC}$  values approximately obey the linear relationship  $G = 0.3326 + (2.315)J_{ATC}$ , where  $J_{ATC}$  is expressed in units of  $mmol\ s^{-1}\ (l\ cell)^{-1}$  and  $G$  is computed in units of ml

$min^{-1}\ (g\ of\ tissue)^{-1}$ . The linear fit between the flow and ATP consumption rate is indicated by the straight line in the figure. This relationship is used to specify a value of  $G$  to use for simulating the system behavior at a given rate of  $J_{ATC}$  in the following section.

Figure 2B illustrates the predicted relationship between mitochondrial ATP production and oxygen consumption over the range of  $J_{ATC}$  values from 0 to 1.7  $mmol\ s^{-1}\ (l\ cell)^{-1}$ . The P/O ratio is the ratio of the rate of ATP synthesis by the  $F_0F_1$ -ATPase to the rate of consumption of oxygen atoms. At  $J_{ATC} = 0$ , the P/O ratio is 0 because no ATP is synthesized while a finite oxygen consumption flux exists to offset the rate of proton leak across the inner mitochondrial membrane. At high values of ATP consumption (and oxygen consumption), the P/O ratio approaches the theoretical maximum of 2.50 for the oxidative phosphorylation model of Beard [7].

### Phosphate Metabolites as a Function of Workload

Using the developed linear relationship between workload and coronary flow, steady-state model predictions were

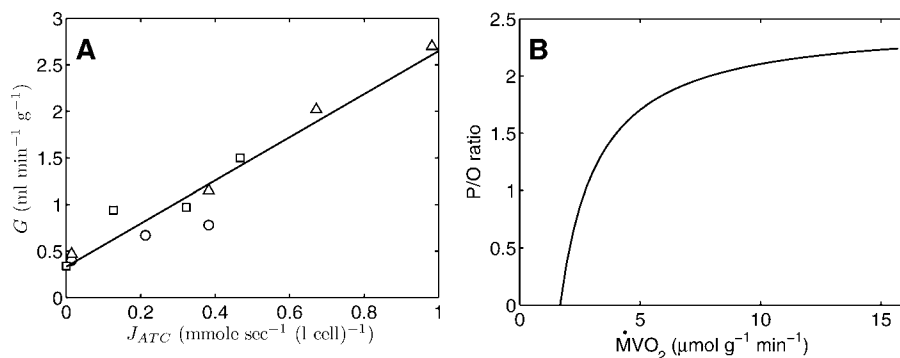

**Figure 2.** Relationships between ATP Consumption Rate, Blood Flow, and Rate of Oxygen Consumption in Cardiac Tissue

(A) Plot of coronary flow from Tables 2, 3, and 4 of Katz et al. [5] as a function of predicted rate of ATP consumption,  $J_{ATC}$ . The values of  $J_{ATC}$  were estimated by matching the model-predicted rate of oxygen consumption,  $MVO_2$ , to the reported experimentally measured estimates of  $MVO_2$ . Circles, squares, and triangles represent data from pacing protocol (Table 2 of [5]), epinephrine protocol (Table 3 of [5]), and phenylephrine protocol (Table 4 of [5]), respectively. The solid line represents the best fit to the data,  $G = 0.3326 + (2.315)J_{ATC}$ , where  $J_{ATC}$  is expressed in units of  $mmol s^{-1} (l cell)^{-1}$  and  $G$  is computed in units of  $ml min^{-1} (g of tissue)^{-1}$ .

(B) The predicted ratio between mitochondrial ATP production and rate of oxygen atom consumption (P/O ratio) is plotted for  $J_{ATC}$  values from 0 to 1.7  $mmol s^{-1} (l cell)^{-1}$ . At  $J_{ATC} = 0$ , the predicted  $MVO_2$  is  $1.68 \mu mol min^{-1} (g of tissue)^{-1}$ , corresponding to the oxygen consumption rate necessary to offset rate of proton leak across the inner mitochondrial membrane.

DOI: 10.1371/journal.pcbi.0020107.g002

calculated for a range of  $J_{ATC}$  values from 0 to  $1.7 mmol s^{-1} (l cell)^{-1}$ . Over this range, the predicted  $MVO_2$  varies from  $1.68 \mu mol min^{-1} (g of tissue)^{-1}$  to  $15.7 \mu mol min^{-1} (g of tissue)^{-1}$ . Predictions of ADP and Pi concentrations and CrP/ATP ratio as functions of  $MVO_2$  are plotted in Figure 3. In Figure 3, concentrations of metabolites are computed as the average value in the distributed model for a given steady-state condition.

The black curves in Figure 3A represent the relative cytoplasmic ADP level (normalized to the value at  $J_{ATC} = 0$ ) as a function of  $MVO_2$  for three different values of the total phosphate pool parameter (see Equation 26 in Materials and Methods). Also plotted are data from Figures 2A, 4A, and 6A of Katz et al. [5], which represent experimental observations for the three different stimulus protocols described above. It is apparent that within the range of observed variability, the model predictions match the experimental data for values of  $MVO_2$ , less than approximately  $12 \mu mol min^{-1} (g of tissue)^{-1}$ . At the highest simulated level of  $TPP$  (18 mM), the model predictions diverge from the observed data at  $MVO_2$  values slightly lower than is predicted at  $TPP$  equal to 12 mM and 15 mM. However, regardless of the value of  $TPP$ , the model predicts that the relative ADP concentration is 2-fold to 3-fold higher at  $MVO_2 = 15 \mu mol min^{-1} (g of tissue)^{-1}$  than at the lower work rates. Although the amount of available data for extremely high workloads near  $MVO_2 = 15 \mu mol min^{-1} (g of tissue)^{-1}$  is sparse, the observations indicate that even at these extreme work rates, the cellular ADP level does not significantly increase from the minimum value.

Figure 3B plots the predicted CrP/ATP ratio in the cytoplasm as a function of  $MVO_2$ , as well as the data from Figures 2C, 4C, and 6C of Katz et al. [5]. Model predictions at  $TPP = 15 mM$  are most consistent with the experimental data. At this value for the total phosphate pool, the model predicts that the ratio CrP/ATP drops from 2 at low work rate to approximately 1 at the highest work rate. Over the range of  $MVO_2$  from 2 to  $6 \mu mol min^{-1} (g of tissue)^{-1}$ , the predicted CrP/ATP ranges from 1.89 to 1.76 at  $TPP = 15 mM$ .

Model-predicted concentrations of cytoplasmic Pi as a function of work rate are plotted in Figure 3C. The model predicts that at  $TPP = 15 mM$ ,  $[Pi]_c$  increases from 0.02 mM at 0 workload to 0.36 mM at  $MVO_2 = 6 \mu mol min^{-1} (g of tissue)^{-1}$  to 3.1 mM at  $MVO_2 = 15 \mu mol min^{-1} (g of tissue)^{-1}$ . Over the range for which the model best fits the observed data on ADP and CrP/ATP [ $MVO_2 = 1.68$  to  $12 \mu mol min^{-1} (g of tissue)^{-1}$ ], the model predicts that Pi concentration increases from 0.02 mM to 1.6 mM. While it is difficult to absolutely quantify Pi concentration in vivo in the heart from  $^{31}P$ -NMR spectroscopy, it is possible to estimate changes in the amount of Pi relative to other phosphate metabolites. Zhang et al. [14] report  $\Delta P/CrP$  in the canine heart—the change in Pi relative to phosphocreatine—from baseline to maximally stimulated contraction to be 0.21. This value of  $\Delta P/CrP$  corresponds to a change in Pi of approximately 2 mM, which is consistent with our model predictions.

In Figure 3D, the predicted  $MVO_2$  is plotted as a function of absolute cytoplasmic ADP concentration. For comparison, data obtained from in vivo hearts of newborn (open squares) and adult (shaded triangles) from Portman et al. [9] are plotted in Figure 3D. Cytoplasmic ADP concentration is predicted to be approximately 0.1 to 0.15 mM in low and moderate workload conditions at the preferred value of  $TPP = 15 mM$ .

Figure 3E illustrates that cytoplasmic ATP concentration remains constant (with less than 10% variation) over the simulated range of work rate for all values of  $TPP$ . Thus the predicted variation in CrP/ATP ratio is due to changes in the CrP concentration, as illustrated in Figure 3F, which plots cytoplasm CrP as a function of  $MVO_2$ .

Based on the above calculations, the parameter  $TPP$  is set to 15 mM for the remaining simulations.

### Cytoplasmic versus Mitochondrial Metabolite Pools

As described above, the solid curves in Figure 3 represent the predicted levels of ADP, CrP/ATP, and Pi in the cytoplasm. Comparing these values to the data of Katz et al. [5] is consistent with assumptions made in that paper that an

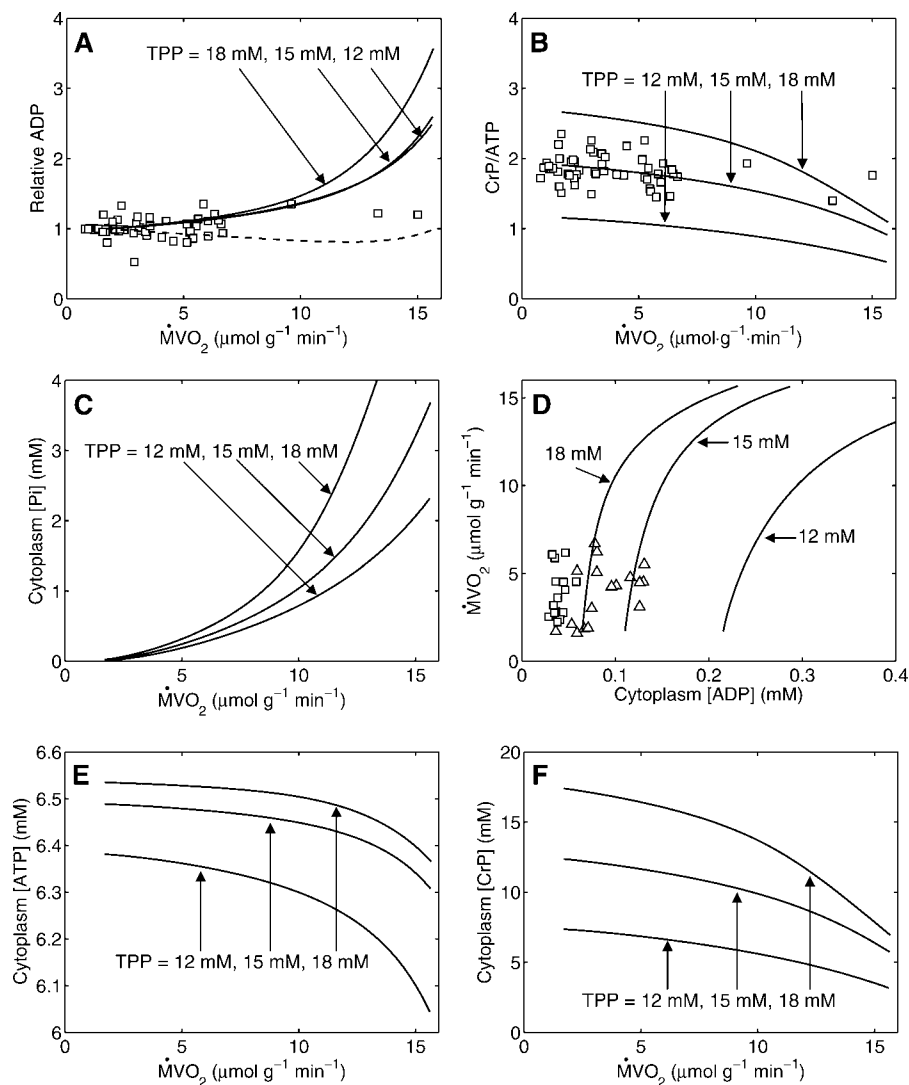

**Figure 3.** Comparison of the Model Simulations to Experiment Data on Energetic Phosphate Compounds in Cardiac Tissue at Varying Cardiac Work Rate (A) Normalized ADP is plotted as a function of  $MVO_2$ . Solid lines correspond to model simulations of cytoplasmic ADP at different values of total phosphate pool,  $TPP = 12, 15, \text{ and } 18 \text{ mM}$ . Dashed line represents total relative ADP mass (cytoplasmic plus mitochondrial) predicted for  $TPP = 15 \text{ mM}$ . (B) Ratio cytoplasmic CrP/ATP is plotted as a function of  $MVO_2$ . Solid lines correspond to model simulations at different values of total phosphate pool,  $TPP = 12, 15, \text{ and } 18 \text{ mM}$ . (C) Cytoplasm Pi concentration is plotted as a function of  $MVO_2$ . (D) Predicted  $MVO_2$  is plotted as a function of predicted ADP concentration in cytoplasm. Solid lines correspond to model simulations at different values of total phosphate pool,  $TPP = 12, 15, \text{ and } 18 \text{ mM}$ , indicated in figure. Experimental data in (A) and (B) are obtained from Katz et al. [5]; data in (D) is obtained from Portman et al. [9]. In all panels, model curves are obtained by varying  $J_{ATC}$  from 0 to  $1.7 \text{ mmol s}^{-1} (\text{l cell})^{-1}$  and setting flow according to  $G = 0.3326 + (2.315)J_{ATC}$ , where  $J_{ATC}$  is expressed in units of  $\text{mmol s}^{-1} (\text{l cell})^{-1}$  and  $G$  is computed in units of  $\text{ml min}^{-1} (\text{g of tissue})^{-1}$ . (E) Predicted cytoplasmic ATP concentration is plotted as a function of predicted  $MVO_2$ . (F) Predicted cytoplasmic CrP concentration is plotted as a function of predicted ADP concentration in cytoplasm. DOI: 10.1371/journal.pcbi.0020107.g003

experimental estimate for cytoplasmic ADP concentration can be obtained from the equation  $[\text{ADP}] = [\text{ATP}][\text{CrP}]/K_{CK}[\text{CrP}][\text{H}^+]$ . The application of this equation to experimental data on [ATP] and [CrP]/[Cr] is based on two assumptions: 1) that the measured levels of both ATP and CrP represent concentrations in the cytoplasm and 2) that the creatine kinase (CK) reaction is maintained in equilibrium. This standard assumption is invoked, for example, in the studies of Balaban and coworkers [2,5,9]. However, Garlick and coworkers [15–17] find that both the cytoplasmic and mitochondrial ATP pools are visible in  $^{31}\text{P}$  NMR spectroscopy.

If this were the case, then it would not be appropriate to assume that the total adenine nucleotide pool is in chemical equilibrium with the Cr and CrP, and consequently the reported relative ADP concentrations would not represent unbiased estimates of cytoplasmic ADP. The current model predicts that the total (cytoplasmic plus mitochondrial) ADP pool (plotted as dashed line in Figure 3A) is effectively constant over the full range of work rate simulated.

#### Predicted State Variables at Different Workloads

While the previous section illustrates the spatially averaged cardiac phosphate metabolite levels at different steady-state

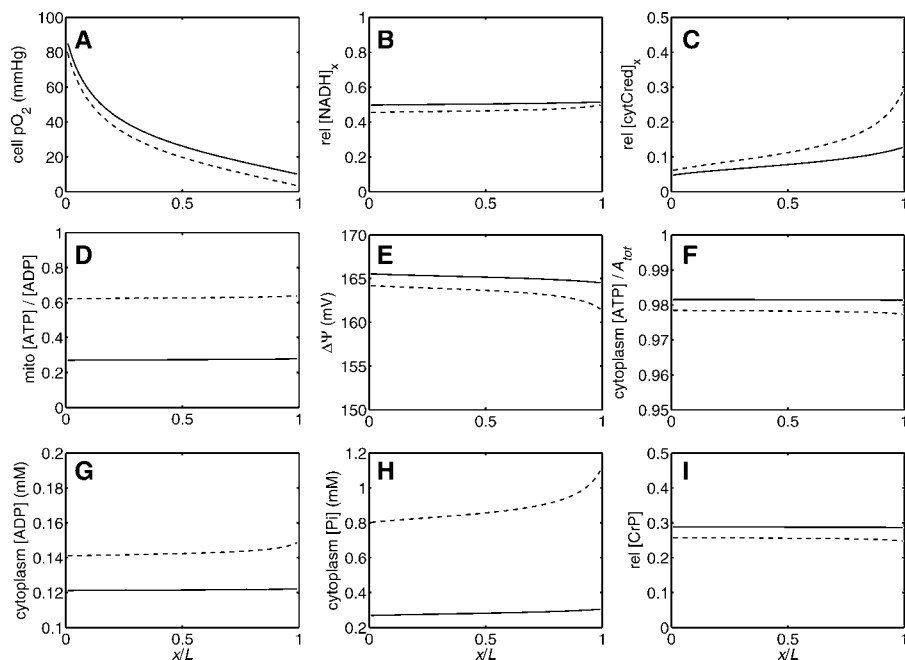

**Figure 4.** Spatial Profiles of Model Variables at Moderate and High Work Rates

Model variables are plotted as a function of  $x/L$ , the normalized distance along the capillary. Arterial blood flows into the capillary at  $x=0$ . For all panels, solid line corresponds to moderate work rate; dashed line corresponds to high work rate. Moderate work rate is defined by setting  $J_{\text{ATC}} = 0.45 \text{ mmol s}^{-1} (\text{l cell})^{-1}$  and  $G = 0.75 \text{ ml min}^{-1} (\text{g of tissue})^{-1}$ ; high work rate is defined by setting  $J_{\text{ATC}} = 0.90 \text{ mmol s}^{-1} (\text{l cell})^{-1}$  and  $G = 1.25 \text{ ml min}^{-1} (\text{g of tissue})^{-1}$ .

- (A) Cellular  $\text{pO}_2$  is plotted versus  $x/L$ .  
 (B) Mitochondrial  $\text{NADH}/\text{NAD}_{\text{tot}}$  is plotted versus  $x/L$ .  
 (C) Mitochondrial  $\text{cytoC}(\text{red})^{2+}/\text{cytC}_{\text{tot}}$  is plotted versus  $x/L$ .  
 (D) Mitochondrial  $\text{ATP}/\text{ADP}$  is plotted versus  $x/L$ .  
 (E) Mitochondrial membrane potential is plotted versus  $x/L$ .  
 (F) Cytoplasm  $\text{ATP}/A_{\text{tot}}$  is plotted versus  $x/L$ .  
 (G) Cytoplasm  $\text{ADP}$  concentration is plotted versus  $x/L$ .  
 (H) Cytoplasm  $\text{Pi}$  concentration is plotted versus  $x/L$ .  
 (I) Cytoplasm  $\text{CrP}/\text{CR}_{\text{tot}}$  is plotted versus  $x/L$ .

DOI: 10.1371/journal.pcbi.0020107.g004

work rates, in this section predicted spatial profiles of model variables are explored at two different work rates. Specifically, simulations were performed at  $J_{\text{ATC}} = 0.45 \text{ mmol s}^{-1} (\text{l cell})^{-1}$  and  $G = 0.75 \text{ ml min}^{-1} (\text{g of tissue})^{-1}$  (defined as *moderate* work rate) and at  $J_{\text{ATC}} = 0.90 \text{ mmol s}^{-1} (\text{l cell})^{-1}$  and  $G = 1.25 \text{ ml min}^{-1} (\text{g of tissue})^{-1}$  (defined as *high* work rate). At the moderate work rate, oxygen consumption and extraction were computed to be  $5.3 \mu\text{mol min}^{-1} (\text{g of tissue})^{-1}$  and 76%; at the high work rate, oxygen consumption and extraction were computed to be  $9.1 \mu\text{mol min}^{-1} (\text{g of tissue})^{-1}$  and 78%. The predicted values of venous  $\text{PO}_2$  are 18.5 mm Hg and 17.9 mm Hg for the moderate and high work rates, respectively.

Predicted spatial profiles of nine state variables are plotted in Figure 4, with solid lines and dashed lines representing data from the moderate and high work rates, respectively. From Figure 4A, it is apparent that at the high work rate, cellular  $\text{PO}_2$  approaches 0 near the venous end of the capillary. At the moderate work rate, the minimum cellular  $\text{PO}_2$  is 10.6 mm Hg; the minimum cellular  $\text{PO}_2$  at the high work rate is 2.9 mm Hg. Although the cellular  $\text{PO}_2$  varies along the length of the capillary, it is apparent that at a given workload, most of the state variables remain relatively constant throughout the cell region. Mitochondrial  $\text{NADH}$  and cytoplasmic  $\text{ADP}$  and  $\text{Pi}$  are predicted to be slightly elevated in the region of lowest oxygenation at the high work rate;  $\Delta\Psi$  is 2 mV to 3 mV lower in the region of low oxygen at the high

work rate than it is for the majority of the myocyte space. The cytoplasmic  $\text{ATP}$  concentration (Figure 4F) is approximately 98% of the total adenine nucleotide pool at moderate and high work rates. The cellular  $\text{Pi}$  concentration is predicted to increase from approximately 0.3 mM at moderate work to approximately 1 mM at high work.

#### Phosphate Metabolites during Graded Hypoperfusion

To explore the behavior of the integrated model during ischemia, when the tissue may become hypoxic to an extent greater than that observed in the simulations described above, it is not possible to treat the  $\text{ATP}$  consumption flux as a constant that does not depend on the available cytoplasmic  $\text{ATP}$ . To ensure that  $\text{ATP}$  concentration is not allowed to become negative, it is necessary to model the  $\text{ATP}$  consumption flux using an expression that approaches 0 as  $\text{ATP}$  concentration approaches 0. In this section, in which the high-energy phosphate metabolic response of cardiac tissue to graded hypoperfusion is simulated, the  $\text{ATP}$  consumption flux is modeled using the expression

$$J_{\text{ATC}} = V_{\text{ATC}} \frac{[\text{ATP}]_c}{[\text{ATP}]_c + 10[\text{ADP}]_c}, \quad (1)$$

where the flux approaches the constant  $V_{\text{ATC}}$  under normal conditions when  $\text{ATP}$  concentrations are more than 50 times higher than cytoplasm  $\text{ADP}$  concentrations.

To simulate the model response to graded hypoperfusion,  $V_{ATC}$  is set to  $0.48 \text{ mmol s}^{-1} (\text{l cell})^{-1}$  and flow is varied from  $0.025$  to  $1.25 \text{ ml min}^{-1} (\text{g of tissue})^{-1}$ , corresponding to the range of coronary blood flows imposed in the study by Zhang et al. [10]. The value  $V_{ATC} = 0.48 \text{ mmol s}^{-1} (\text{l cell})^{-1}$  was chosen to achieve reasonable agreement between the experimental data and model predictions. Over the range of myocardial flow, Zhang et al. [10] measured ATP, CrP, Pi, and oxy-myoglobin saturation ( $S_{Mb}$ ), in dog myocardium in vivo. These data are compared to steady-state model predictions in Figure 5. The raw data from Zhang et al. [10] were normalized so that the measured ATP concentration at normal flow was equal to  $6.5 \text{ mM}$ , the model-predicted ATP concentration for normoxic nonischemic conditions. The same scaling that was applied to the raw data for ATP was applied to the raw CrP and Pi data to obtain estimates of the molar concentrations of these species.

As expected, ATP, CrP, and  $S_{Mb}$  levels drop and cytoplasm Pi increases as flow is reduced. In general, the order of magnitude and the qualitative trends in the model predictions match the experimental observations. However, the experimental observations show a smoother variation with flow in these four variables than is predicted by the model. The observed differences between model predictions and observed data of Figure 5 are expected to be in part accounted for by the fact that in the current model myocardial heterogeneities in flow

and capillary length are not considered. This issue is discussed in greater detail in the Discussion section.

## Discussion

### Control of Phosphate Metabolites

The major finding of this study is that the integrated model is able to reproduce experimental observations on ATP, ADP, CrP, and Pi over a range of workload and during coronary hypoperfusion. The integrated model explains metabolite levels observed at low to moderate workloads and the changes in metabolite levels and tissue oxygenation observed during graded hypoperfusion. The level of agreement between model predictions and experimental measurements is significant because the integrated model introduces only a single adjustable parameter. During a 10-fold increase in workload (rates of ATP and oxygen consumption), the cytoplasmic ATP, ADP, and CrP concentrations and mitochondrial NADH concentrations are predicted to change little. The cytoplasmic Pi concentration is predicted to increase from approximately  $0.15 \text{ mM}$  at an oxygen consumption of  $4 \mu\text{mol min}^{-1} (\text{g of tissue})^{-1}$  to approximately  $1.0 \text{ mM}$  at an oxygen consumption of  $10 \mu\text{mol min}^{-1} (\text{g of tissue})^{-1}$ . Over this range the model predictions closely match experimental measurements and indicate that cytoplasmic Pi level is a key regulator of the rate of mitochondrial respiration. At work rates higher than approximately 12

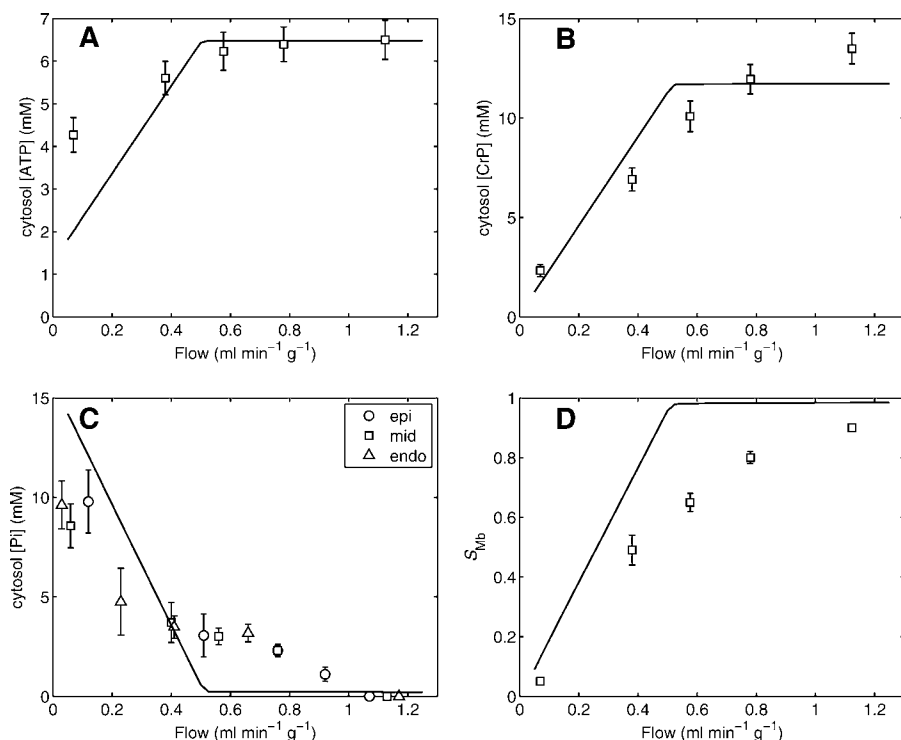

**Figure 5.** Model Simulations of Cardiac Energetic Phosphate Metabolite Levels and Myoglobin Saturation during Coronary Hypoperfusion

(A) Model-predicted cytoplasmic ATP concentration as a function of myocardial blood flow.

(B) Model-predicted cytoplasmic CrP concentration as a function of myocardial blood flow.

(C) Model-predicted cytoplasmic Pi concentration as a function of myocardial blood flow. Experimental data are divided into epicardium (epi), midwall (mid), and endocardium (endo).

(D) Model-predicted mean myoglobin saturation as a function of myocardial blood flow. For all panels, ATP consumption flux is simulated using Equation 1, and  $V_{ATC}$  is set to  $0.48 \text{ mmol s}^{-1} (\text{l cell})^{-1}$ . Experimental data are for canine and left ventricular myocardium and obtained from Zhang et al. [10].

DOI: 10.1371/journal.pcbi.0020107.g005

$\mu\text{mol min}^{-1} (\text{g of tissue})^{-1}$ , the model predictions of cytoplasmic ADP and CrP/ATP ratio are slightly elevated compared to low work states. Total cytoplasmic plus mitochondrial ADP is effectively constant over the entire observed range of work rate. In addition, the validated model provides quantitative predictions of changes in phosphate metabolites during cardiac ischemia. Comparison of model predictions to the data of Zhang et al. [10] provides independent validation of the model. Although these modeling results depend on the chosen value of the maximal rate of ATP consumption ( $V_{\text{ATC}}$ ), the model predictions in the extreme limits of flow do not depend on the choice of  $V_{\text{ATC}}$ . It is significant that the predicted Pi concentration of approximately 14 mM in the zero-flow limit and the predicted CrP concentration of approximately 12 mM at the high-flow limit are close to the observations of Zhang et al. [10].

Previous modeling studies of Korzeniewski et al. [18] have attributed the myocardium's ability to maintain homeostatic concentrations of ATP and CrP over a range of work rates to a "parallel activation" mechanism in which all respiratory complexes and the rate of substrate dehydrogenation are increased in synchrony with the rate of ATP consumption. However, no independent verification of the parallel activation hypothesis exists. In the current analysis, the biophysical model of cardiac oxidative phosphorylation and mitochondrial substrate transport was developed from an entirely independent set of data on isolated mitochondria [7]. The observed stability of energy metabolites emerges as a property of a properly constructed model of cardiac oxygen transport and mitochondrial metabolism. Thus the current analysis casts some doubt on the parallel activation hypothesis.

As concluded previously by Saks et al. [19,20], the current analysis predicts that Pi is an important feedback signal regulating respiration in cardiomyocytes. However, important differences exist between the current model and earlier models presented by the Saks group [20,21]. Specifically, the earlier models have applied an arbitrary scaling to previously developed models of mitochondrial oxidative phosphorylation, to match the observed dynamic range of oxygen consumption in isolated rat heart. The current model scales the model of isolated mitochondria based on independent estimates of cardiac mitochondrial volume density, eliminating an arbitrary fitting parameter necessary in the earlier models. Studies from the Saks laboratory have also suggested that coupling between mitochondrial creatine kinase and the adenine nucleotide translocase system on the mitochondrial inner membrane plays a role in maintaining metabolic homeostasis in the heart [20–23]. It will be valuable to incorporate the Vendelin–Saks model of the mitochondrial creatine kinase shuttle into the current model to explore its possible role in regulating respiration and metabolite concentrations.

The findings of the current study are consistent with the observations of Jeneson et al. [24,25] that, in skeletal muscle, ADP concentrations vary less than approximately 5-fold between minimum and maximal work rate. The current model predicts that ADP is 1.3 times higher at  $\text{MVO}_2$  of 10  $\mu\text{mol min}^{-1} (\text{g of tissue})^{-1}$  than at  $\text{MVO}_2$  of 1.7  $\mu\text{mol min}^{-1} (\text{g of tissue})^{-1}$ . At the maximal  $\text{MVO}_2$  the predicted ADP concentration is 2.5 times greater than that at the minimum. The predicted cardiac Pi concentration is predicted to be too

low to be detectable in NMR at low work rates [0.15 mM at  $\text{MVO}_2$  of 4  $\mu\text{mol min}^{-1} (\text{g of tissue})^{-1}$ ] and to increase to the millimolar range at high work rates [1.0 mM at  $\text{MVO}_2$  of 10  $\mu\text{mol min}^{-1} (\text{g of tissue})^{-1}$ ].

### Mitochondrial P/O Ratio

The oxidative phosphorylation model predicts that the cardiac mitochondrial P/O ratio exceeds the value of 2 for  $\text{MVO}_2$  greater than 7.8  $\mu\text{mol min}^{-1} (\text{g of tissue})^{-1}$  or approximately 200  $\mu\text{l O}_2 \text{ min}^{-1} (\text{g of tissue})^{-1}$ . For lower values of oxygen consumption, the P/O ratio is less than 2, indicating that oxidative ATP synthesis is significantly less efficient at moderate work rates than at maximal work rates in the heart. This behavior is due to the fact that the predicted oxygen flux necessary to compensate for proton leak is nearly constant. Thus the relative contribution of proton leak to oxygen consumption increases with decreasing  $\text{MVO}_2$ .

Since the oxygen flux associated with the proton leak is approximately one tenth of  $\text{MVO}_2^{\text{max}}$ , the maximal rate of oxygen consumption, the P/O ratio as a function of  $\text{MVO}_2$  is approximately expressed as  $\text{P/O} = 2.5 (\text{MVO}_2 - 0.1\text{MVO}_2^{\text{max}}) / \text{MVO}_2$ , where 2.5 is the theoretical maximum obtained by the model of oxidative phosphorylation in the absence of a leak current.

### Future Considerations

It is likely that additional regulatory mechanisms that are not currently incorporated into the model may become important at high work rates. One putatively important signal is calcium. Cortassa et al. [26] and Jafri et al. [27–29] developed models of mitochondrial calcium handling and calcium-dependent activation of the TCA cycle. At high work rates, increased mitochondrial calcium may provide a feed-forward signal to stimulate increased dehydrogenase activity. The current model, which uses a phenomenological function to drive the reduction of  $\text{NAD}^+$ , does not account for the possible role of calcium signaling in controlling cardiac respiration. Future work will integrate the detailed kinetics of the TCA cycle and calcium activation of the Jafri and Cortassa models into the current model to explore the impact of calcium signaling on cardiac metabolic regulation.

Previous analysis of oxygen transport in isolated perfused hearts has revealed that heterogeneities in microvascular geometry and flow are important in realistically simulating oxygen transport to cardiac tissue [30,31]. Yet the current model uses a single-capillary three-region model to simulate oxygen transport and metabolism. It is likely that the lack of heterogeneity in the model is responsible in part for the deviations between model predictions and experimental measurements of ATP, Pi, CrP, and  $S_{\text{Mb}}$  during hypoperfusion. The predicted sharp transition from constant metabolite concentrations at higher flows to linearly decreasing concentrations at lower flows is a result of the model being composed of a single capillary. When flow is high enough to maintain normoxia, the energy metabolite concentrations are predicted to be stable. At lower flows, the myoglobin saturation is directly proportional to the fraction of the cell that is normoxic, which increases linearly with flow at a constant work rate. In the future, the current detailed model of cellular energetics will be ported to simulations in heterogeneous three-dimensional geometries, such as that described in [30].



The single-capillary model is used in the current work because the computational costs of the integrated model are substantial. Conducting such simulations based on a three-dimensional model will require significant computational times, substantial optimization of the simulation codes, and/or increases in available computing resources.

The current model analysis of the data on flow and oxygen consumption reveals an approximately linear relationship between whole-heart cardiac perfusion and the rate of ATP consumption (illustrated in Figure 2A). Yet it has been observed that local myocardial blood flow can vary regionally by up to 10-fold in vivo [32–35]. Since oxygen [35] and fatty acid [36] uptake are tightly proportional to regional flow in the myocardium, it is proposed that ATP hydrolysis varies regionally as well. Future studies that link coronary blood flow, oxygen and substrate transport, cellular and whole-heart mechanics, and energy metabolism are expected to shed light on the physiological basis for regional heterogeneities in substrate delivery in the heart.

## Summary

In sum, the integrated model of cardiac oxygen transport and mitochondrial oxidative phosphorylation is able to explain a set of data that has persisted unexplained in the literature for two decades. The model analysis predicts that Pi is a key regulator of oxidative phosphorylation in the heart, allowing ATP and CrP levels to remain relatively constant over a large range of cardiac work rate. The integrated model provides the basic framework for simulating the metabolic response of the myocardium to ischemia and hypoxia.

## Materials and Methods

**Governing equations for oxygen transport.** Oxygen transport in the capillary is governed by advection of the blood, oxygen-hemoglobin binding and unbinding, and passive permeation between the blood and the interstitial space. The governing equation for oxygen in the capillary is

$$\frac{\partial C_{O,1}}{\partial t} = -\frac{\rho GL}{V_1} \frac{\partial C_{O,1}}{\partial x} - \frac{\alpha_1 PS_{12}}{V_1} (P_1 - P_2) \quad (2)$$

where  $C_{O,1}(x,t)$  is the total oxygen concentration in the blood (free plus hemoglobin-bound oxygen),  $G$  is blood flow to the tissue in volume per unit time per mass of tissue,  $\rho$  is the tissue density in mass per unit volume,  $L$  is the length of the capillary,  $V_1$  is the volume of the capillary region,  $\alpha_1$  is the oxygen solubility coefficient in blood,  $PS_{12}$  is the permeability of the surface area of capillary wall, and  $P_1$  and  $P_2$  are the oxygen partial pressures in blood and interstitial fluid, respectively. The capillary oxygen concentration  $C_{O,1}$  is a function of the distance along the capillary,  $x$ , and time,  $t$ .

The total oxygen concentration of the capillary region is related to the partial pressure by

$$C_{O,1} = \alpha_1 P_1 + Hct C_{Hb} S_{Hb}, \quad (3)$$

where  $Hct$  is the hematocrit,  $C_{Hb}$  is the concentration of oxygen binding sites in red blood cells, and  $S_{Hb}$  is the hemoglobin saturation in red blood cells. The hemoglobin saturation curve is assumed to be governed by a Hill equation,

$$S_{Hb} = \frac{P_1^{n_H}}{P_1^{n_H} + P_{50,Hb}^{n_H}} \quad (4)$$

where  $P_{50,Hb}$  is half the partial pressure of  $O_2$  saturation in hemoglobin and  $n_H$  is the Hill exponent.

Oxygen transport in the interstitial region is governed by passive permeation of oxygen between the blood and the interstitial fluid and between the interstitial fluid and the myocyte

$$\frac{\partial C_{O,2}}{\partial t} = -\frac{\alpha_1 PS_{12}}{V_2} (P_1 - P_2) - \frac{\alpha_1 PS_{23}}{V_2} (P_2 - P_3) \quad (5)$$

where  $C_{O,2}(x,t)$  is the oxygen concentration in interstitial region,  $V_2$  is the volume of the interstitial region,  $PS_{23}$  is the permeability surface-area product for passive permeation between interstitial region and the parenchymal cell region, and  $P_3$  is the partial pressure of the oxygen in the cell. Oxygen concentration and partial pressure in the interstitial fluid are related by  $C_{O,2} = \alpha_2 P_2$ , where  $\alpha_2$  is the oxygen solubility coefficient in the interstitial region.

In the cellular region, oxygen transport is governed by passive permeation and consumption of oxygen in mitochondria

$$\frac{\partial C_{O,3}}{\partial t} = \frac{\alpha_1 PS_{23}}{V_3} (P_2 - P_3) - R_{MitoCell} \left( \frac{J_{C4}}{2} \right) \quad (6)$$

where  $C_{O,3}$  is the oxygen concentration in the cellular region,  $V_3$  is the volume of the cellular region,  $R_{MitoCell}$  is the ratio of mitochondrial volume to total cell volume, and  $J_{C4}$  is the flux through Complex IV in the respiratory chain in units of mass per time per unit mitochondrial volume. The factor of  $\frac{1}{2}$  in the second term on the RHS of Equation 6 accounts for the fact that  $J_{C4}$  in the mitochondrial model (described below) represents the flux of electron pairs through the respiratory chain: one  $O_2$  molecule is consumed for each two pairs of electrons transferred through the system. Equation 6 assumes that mitochondria are uniformly and homogeneously distributed in the cellular space.

Total oxygen in the cell is the sum of free oxygen plus myoglobin-bound oxygen

$$C_{O,3} = \alpha_3 P_3 + C_{Mb} S_{Mb}, \quad (7)$$

Where  $C_{Mb}$  is the myoglobin concentration in the cell and  $\alpha_3$  is the oxygen solubility in the myocyte. The equilibrium myoglobin saturation  $S_{Mb}$  is expressed

$$S_{Mb} = \frac{P_3}{P_3 + P_{50,Mb}}, \quad (8)$$

where  $P_{50,Mb}$  is the half-saturation partial pressure for oxygen-myoglobin binding.

**Governing equations for cellular energetics.** The differential equations for species other than oxygen are

$$\partial[H^+]_x/\partial t = \beta^{-1}[H^+]_x$$

$$(+J_{DH} - 5J_{C1} - 2J_{C3} - 4J_{C4} + (n_A - 1)J_{F1} + 2J_{PiHt} - J_{KH} + J_{Hle})/W_x$$

$$\partial[K^+]_x/\partial t = (+J_{KH})/W_x$$

$$\partial[Mg^{2+}]_x/\partial t = (-J_{MgADPx} - J_{MgATPx})/W_x$$

$$\partial[NADH]_x/\partial t = (+J_{DH} - J_{C1})/W_x$$

$$\partial[Q]_x/\partial t = (-J_{C1} + J_{C3})/W_x$$

$$\partial[\text{cytC(ox)}^{2+}]_i/\partial t = (-2J_{C3} + 2J_{C4})/W_i$$

$$\partial[ATP]_x/\partial t = (+J_{F1} - J_{ANT})/W_x$$

$$\partial[mATP]_x/\partial t = (+J_{MgATPx})/W_x$$

$$\partial[mADP]_x/\partial t = (+J_{MgADPx})/W_x$$

$$\partial[Pi]_x/\partial t = (-J_{F1} + J_{PiHt})/W_x$$

$$\partial[ATP]_i/\partial t = (+J_{ATPt} + J_{ANT} + J_{AKi})/W_i$$

$$\partial[ADP]_i/\partial t = (+J_{ADPt} - J_{ANT} - 2J_{AKi})/W_i$$

$$\partial[AMP]_i/\partial t = (+J_{AMPt} + J_{AKi})/W_i$$

$$\partial[mATP]_i/\partial t = (+J_{MgATPi})/W_i$$

$$\partial[mADP]_i/\partial t = (+J_{MgADPi})/W_i$$

Table 2. Model Fluxes

| Category                       | Flux                             | Description                               | Units                                         |
|--------------------------------|----------------------------------|-------------------------------------------|-----------------------------------------------|
| Mitochondrial matrix reactions | $J_{DH}$                         | Mitochondrial dehydrogenase               | $\text{mol s}^{-1} (\text{l mito})^{-1}$      |
|                                | $J_{C1}$                         | Complex I                                 | $\text{mol s}^{-1} (\text{l mito})^{-1}$      |
|                                | $J_{C3}$                         | Complex III                               | $\text{mol s}^{-1} (\text{l mito})^{-1}$      |
|                                | $J_{C4}$                         | Complex IV                                | $\text{mol s}^{-1} (\text{l mito})^{-1}$      |
|                                | $J_{F1}$                         | $F_0F_1$ -ATPase reaction                 | $\text{mol s}^{-1} (\text{l mito})^{-1}$      |
|                                | $J_{ANT}$                        | Adenine nucleotide translocase            | $\text{mol s}^{-1} (\text{l mito})^{-1}$      |
|                                | $J_{PiHt}$                       | Phosphate-hydrogen cotransporter          | $\text{mol s}^{-1} (\text{l mito})^{-1}$      |
|                                | $J_{Hle}$                        | Proton leak                               | $\text{mol s}^{-1} (\text{l mito})^{-1}$      |
|                                | $J_{KH}$                         | Mitochondrial $K^+/H^+$ exchanger         | $\text{mol s}^{-1} (\text{l mito})^{-1}$      |
|                                | $J_{MgATPx}$                     | $Mg^{2+}$ /ATP binding in matrix          | $\text{mol s}^{-1} (\text{l mito})^{-1}$      |
|                                | $J_{MgADPx}$                     | $Mg^{2+}$ /ADP binding in matrix          | $\text{mol s}^{-1} (\text{l mito})^{-1}$      |
|                                | Mitochondrial IM space reactions | $J_{AKi}$                                 | Adenylate kinase flux in IM space             |
| $J_{MgATPi}$                   |                                  | $Mg^{2+}$ /ATP binding in IM space        | $\text{mol s}^{-1} (\text{l mito})^{-1}$      |
| $J_{MgADPi}$                   |                                  | $Mg^{2+}$ /ADP binding in IM space        | $\text{mol s}^{-1} (\text{l mito})^{-1}$      |
| Mitochondrial transport fluxes | $J_{Pit}$                        | Phosphate transport across outer membrane | $\text{mol s}^{-1} (\text{l mito})^{-1}$      |
|                                | $J_{ATPt}$                       | ATP transport across outer membrane       | $\text{mol s}^{-1} (\text{l mito})^{-1}$      |
|                                | $J_{ADPt}$                       | ADP transport across outer membrane       | $\text{mol s}^{-1} (\text{l mito})^{-1}$      |
|                                | $J_{AMPt}$                       | AMP transport across outer membrane       | $\text{mol s}^{-1} (\text{l mito})^{-1}$      |
| Cytoplasmic reactions          | $J_{AKc}$                        | Adenylate kinase flux in cytoplasm        | $\text{mol s}^{-1} (\text{l cytoplasm})^{-1}$ |
|                                | $J_{CKc}$                        | Creatine kinase flux in cytoplasm         | $\text{mol s}^{-1} (\text{l cytoplasm})^{-1}$ |
|                                | $J_{MgATPc}$                     | $Mg^{2+}$ /ATP binding in cytoplasm       | $\text{mol s}^{-1} (\text{l cytoplasm})^{-1}$ |
|                                | $J_{MgADPc}$                     | $Mg^{2+}$ /ADP binding in cytoplasm       | $\text{mol s}^{-1} (\text{l cytoplasm})^{-1}$ |

DOI: 10.1371/journal.pcbi.0020107.t002

$$\partial[\text{Pi}]_i/\partial t = (+J_{Pit} - J_{PiHt})/W_i$$

$$\partial[\text{Mg}^{2+}]_i/\partial t = (-J_{MgADPi} - J_{MgATPi})/W_i$$

$$\partial[\text{ATP}]_c/\partial t = (-R_{\text{MitoCyto}}J_{ATPt} - R_{\text{CellCyto}}J_{ATc} + J_{AKc}J_{CKc})/W_c$$

$$\partial[\text{ADP}]_c/\partial t = (-R_{\text{MitoCyto}}J_{ADPt} + R_{\text{CellCyto}}J_{ATc} - 2J_{AKc} - J_{CKc})/W_c$$

$$\partial[\text{AMP}]_c/\partial t = (-R_{\text{MitoCyto}}J_{AMPt} + J_{AKc})/W_c$$

$$\partial[\text{MgATP}]_c/\partial t = (+J_{MgATPc})/W_c$$

$$\partial[\text{MgADP}]_c/\partial t = (+J_{MgADPc})/W_c$$

$$\partial[\text{Pi}]_c/\partial t = (-R_{\text{MitoCyto}}J_{Pit} + R_{\text{MitoCyto}}J_{ATc})/W_c$$

$$\partial[\text{Mg}^{2+}]_c/\partial t = (-J_{MgADPc} - J_{MgATPc})/W_c$$

$$\partial[\text{CrP}]_c/\partial t = (-J_{CKc})/W_c$$

$$\partial[\text{CrP}]_c/\partial t = (-J_{CKc})/W_c$$

$$\partial\Delta\Psi/\partial t = (+4J_{C1} + 2J_{C3} + 4J_{C4} - n_A J_{F1} - J_{ANT} - J_{Hle})/C_{IM} \quad (9)$$

In the above set of equations, the subscripts x, i, and c denote mitochondrial matrix, intermembrane (IM) space, and cytoplasm, respectively. All of the variables in this set of equations are defined in Table 1.

In addition to the state variables treated in Equations 1, 4, 5, and 8, the concentrations of several species are computed

$$\begin{aligned} [\text{NAD}]_x &= \text{NAD}_{\text{tot}} - [\text{NADH}]_x \\ [\text{QH}_2] &= \text{Q}_{\text{tot}} - [\text{Q}] \\ [\text{cytC}(\text{red})^{3+}] &= \text{cytC}_{\text{tot}} - [\text{cytC}(\text{ox})^{2+}] \\ [\text{ADP}]_x &= \text{A}_{\text{tot}} - [\text{ATP}]_x \\ [\text{Cr}]_c &= \text{CR}_{\text{tot}} - [\text{CrP}]_c \end{aligned} \quad (10)$$

where  $\text{NAD}_{\text{tot}}$ ,  $\text{Q}_{\text{tot}}$ ,  $\text{cytC}_{\text{tot}}$ , and  $\text{A}_{\text{tot}}$  are the total concentrations of NAD(H), ubiquinol, cytochrome c, and adenine nucleotide in the matrix, respectively, and  $\text{CR}_{\text{tot}}$  is the total creatine plus creatine phosphate concentration in the cytoplasm.

Parameters that appear in the above equations are described in detail below. The fluxes that appear on the right-hand side of the governing equations are tabulated in Table 2. For mitochondrial species, the governing equations follow from [7]. For cytoplasmic species, the reactions modeled are ATP consumption, creatine kinase reaction, adenylate kinase reaction, and transport between the cytoplasm and the mitochondrial IM space.

**Mathematical expressions for mitochondrial fluxes.** Flux expressions for the mitochondrial model (based on a previously developed model [7]) are listed below. Definitions of the variables and parameters that appear in the following expressions are listed in Tables 2 and 3.

Dehydrogenase flux:

$$J_{DH} = X_{DH} \left( \frac{1 + [\text{Pi}]_x/k_{Pi,1}}{1 + [\text{Pi}]_x/k_{Pi,2}} \right) (r[\text{NAD}]_x - [\text{NADH}]_x) \quad (11)$$

Complex I flux:

$$J_{C1} = X_{C1} \left( e^{-(\Delta G_{0,C1} + 4\Delta G_H - RT \ln([\text{H}^+]_c/[\text{H}^+]_x))} / RT [\text{NADH}]_x [\text{Q}] - [\text{NAD}]_x [\text{QH}_2] \right), \quad (12)$$

where  $\Delta G_H = F\Delta\Psi + RT \ln([\text{H}^+]_c/[\text{H}^+]_x)$ .

Complex III flux:

$$J_{C3} = X_{C3} \left( \frac{1 + [\text{Pi}]_x/k_{Pi,3}}{1 + [\text{Pi}]_x/k_{Pi,4}} \right) \left( e^{-(\Delta G_{0,C3} + 4\Delta G_H - 2F\Delta\Psi)/2RT} [\text{cytC}(\text{ox})^{3+}] [\text{QH}_2]^{1/2} - [\text{cytC}(\text{red})^{2+}] [\text{Q}]^{1/2} \right). \quad (13)$$

Complex IV flux:

$$J_{C4} = X_{C4} \left( \frac{[\text{O}_2]}{[\text{O}_2] + k_{O_2}} \right) \frac{[\text{cytC}(\text{red})^{2+}]}{\text{cytC}_{\text{tot}}} \left( e^{-(\Delta G_{0,C4} + 2\Delta G_H - 2RT \ln([\text{H}^+]_x/10^{-7}))} / 2RT [\text{cytC}(\text{red})^{2+}] [\text{O}_2]^{1/4} - e^{+F\Delta\Psi/RT} [\text{cytC}(\text{ox})^{3+} + 1] \right), \quad (14)$$

where  $[\text{O}_2] = \alpha_3 P_3$  is the free oxygen concentration in the cell.

**Table 3.** Parameter Values

| Category                              | Parameter                                           | Description                                                                  | Value                                      | Units                                                                       | Reference                                   |                      |
|---------------------------------------|-----------------------------------------------------|------------------------------------------------------------------------------|--------------------------------------------|-----------------------------------------------------------------------------|---------------------------------------------|----------------------|
| <b>Oxygen transport parameters</b>    | $\alpha_1$                                          | Plasma O <sub>2</sub> solubility                                             | $1.30 \times 10^{-6}$                      | M mm Hg <sup>-1</sup>                                                       | [42]                                        |                      |
|                                       | $\alpha_2$                                          | Interstitial fluid O <sub>2</sub> solubility                                 | $1.25 \times 10^{-6}$                      | M mm Hg <sup>-1</sup>                                                       | [43]                                        |                      |
|                                       | $\alpha_3$                                          | Myocyte O <sub>2</sub> solubility                                            | $1.74 \times 10^{-6}$                      | M mm Hg <sup>-1</sup>                                                       | [44]                                        |                      |
|                                       | $PS_{12}$                                           | Capillary wall PS product                                                    | 50                                         | ml s <sup>-1</sup> (ml tissue) <sup>-1</sup>                                | [38,39]                                     |                      |
|                                       | $PS_{23}$                                           | Myocyte fiber PS product                                                     | 10                                         | ml s <sup>-1</sup> (ml tissue) <sup>-1</sup>                                | [45]                                        |                      |
|                                       | $Hct$                                               | Hematocrit                                                                   | 0.45                                       | unitless                                                                    |                                             |                      |
|                                       | $C_{Hb}$                                            | Oxyhemoglobin binding site concentration                                     | 0.0213                                     | mol (l RBC) <sup>-1</sup>                                                   | [42]                                        |                      |
|                                       | $P_{50,Hb}$                                         | Hemoglobin half-saturation P <sub>O<sub>2</sub></sub>                        | 30.0                                       | mm Hg                                                                       | [46]                                        |                      |
|                                       | $n_H$                                               | Hemoglobin Hill coefficient                                                  | 2.55                                       | unitless                                                                    | [46]                                        |                      |
|                                       | $C_{Mb}$                                            | Myoglobin concentration                                                      | $200 \times 10^{-6}$                       | mol (l cell) <sup>-1</sup>                                                  |                                             |                      |
|                                       | $P_{50,Mb}$                                         | Myoglobin half-saturation P <sub>O<sub>2</sub></sub>                         | 2.39                                       | mm Hg                                                                       | [47]                                        |                      |
|                                       | <b>Structure/volume parameters</b>                  | $P_{input}$                                                                  | Arterial oxygen P <sub>O<sub>2</sub></sub> | 100                                                                         | mm Hg                                       |                      |
| $\rho$                                |                                                     | Tissue density                                                               | 1.053                                      | g (ml tissue) <sup>-1</sup>                                                 | [37]                                        |                      |
| $L$                                   |                                                     | Capillary length                                                             | 550                                        | μm                                                                          | [40]                                        |                      |
| $V_1$                                 |                                                     | Capillary blood volume                                                       | 0.05                                       | ml (ml tissue) <sup>-1</sup>                                                | [36,48] <sup>a</sup>                        |                      |
| $V_2$                                 |                                                     | Interstitial volume                                                          | 0.17585                                    | ml (ml tissue) <sup>-1</sup>                                                | [37]                                        |                      |
| $V_3$                                 |                                                     | Cell volume                                                                  | 0.73078                                    | ml (ml tissue) <sup>-1</sup>                                                | [37]                                        |                      |
| $W_x$                                 |                                                     | Matrix water space fraction                                                  | 0.6514                                     | l water (l mito) <sup>-1</sup>                                              | [7,37]                                      |                      |
| $W_i$                                 |                                                     | IM space water fraction                                                      | 0.0724                                     | l water (l mito) <sup>-1</sup>                                              | [7,37]                                      |                      |
| $W_c$                                 |                                                     | Cytoplasm water fraction                                                     | 0.8425                                     | l water (l cytoplasm) <sup>-1</sup>                                         | [37]                                        |                      |
| $R_{MitoCell}$                        |                                                     | Mitochondrial/cell volume ratio                                              | 0.2882                                     | l mito (l cell) <sup>-1</sup>                                               | [37]                                        |                      |
| $R_{MitoCyto}$                        |                                                     | Mitochondrial/cytoplasm volume ratio                                         | 0.4237                                     | l mito (l cell) <sup>-1</sup>                                               | [37]                                        |                      |
| $R_{cellCyto}$                        |                                                     | Cell/cytoplasm volume ratio                                                  | 1.4703                                     | l cell (l cytoplasm) <sup>-1</sup>                                          | [37]                                        |                      |
| <b>Physicochemical parameters</b>     | $\gamma$                                            | Outer membrane area per mito volume                                          | 5.99                                       | μm <sup>-1</sup>                                                            | [49]                                        |                      |
|                                       | $RT$                                                | Gas constant times temperature                                               | 2.5775                                     | kJ mol <sup>-1</sup>                                                        | <sup>-b</sup>                               |                      |
|                                       | $F$                                                 | Faraday's constant                                                           | 0.096484                                   | kJ mol <sup>-1</sup> mV <sup>-1</sup>                                       | <sup>-b</sup>                               |                      |
|                                       | $\Delta G_{O,C1}$                                   | Standard free energy, Complex I                                              | -69.37                                     | kJ mol <sup>-1</sup>                                                        | [50] <sup>c</sup>                           |                      |
|                                       | $\Delta G_{O,C3}$                                   | Standard free energy, Complex III                                            | -32.53                                     | kJ mol <sup>-1</sup>                                                        | [50] <sup>c</sup>                           |                      |
|                                       | $\Delta G_{O,C4}$                                   | Standard free energy, Complex IV                                             | -122.94                                    | kJ mol <sup>-1</sup>                                                        | [50] <sup>c</sup>                           |                      |
| <b>Mitochondrial model parameters</b> | $\Delta G_{O,ATP}$                                  | Standard free energy, ATPase                                                 | 36.03                                      | kJ mol <sup>-1</sup>                                                        | [50] <sup>c</sup>                           |                      |
|                                       | $R$                                                 | Dehydrogenase model parameter                                                | 4.559                                      | unitless                                                                    | [7,41] <sup>d</sup>                         |                      |
|                                       | $k_{Pi,1}$                                          | Dehydrogenase model parameter                                                | 0.1553                                     | mM                                                                          | [7,41] <sup>d</sup>                         |                      |
|                                       | $k_{Pi,2}$                                          | Dehydrogenase model parameter                                                | 0.8222                                     | mM                                                                          | [7,41] <sup>d</sup>                         |                      |
|                                       | $X_{DH}$                                            | Dehydrogenase activity                                                       | 0.0866                                     | mol s <sup>-1</sup> M <sup>-1</sup> (l mito) <sup>-1</sup>                  | [7,41] <sup>d</sup>                         |                      |
|                                       | $X_{C1}$                                            | Complex I activity                                                           | $4.405 \times 10^3$                        | mol s <sup>-1</sup> M <sup>-2</sup> (l mito) <sup>-1</sup>                  | [7,41] <sup>d</sup>                         |                      |
|                                       | $X_{C3}$                                            | Complex III activity                                                         | 4.887                                      | mol s <sup>-1</sup> M <sup>-3/2</sup> (l mito) <sup>-1</sup>                | [7,41] <sup>d</sup>                         |                      |
|                                       | $X_{C4}$                                            | Complex IV activity                                                          | $6.766 \times 10^{-5}$                     | mol s <sup>-1</sup> M <sup>-1</sup> (l mito) <sup>-1</sup>                  | [7,41] <sup>d</sup>                         |                      |
|                                       | $X_{F1}$                                            | F <sub>0</sub> F <sub>1</sub> -ATPase activity                               | 1000                                       | mol s <sup>-1</sup> M <sup>-1</sup> (l mito) <sup>-1</sup>                  | [7,41] <sup>d</sup>                         |                      |
|                                       | $X_{ANT}$                                           | ANT activity                                                                 | $8.123 \times 10^{-3}$                     | mol s <sup>-1</sup> (l mito) <sup>-1</sup>                                  | [7,41] <sup>d</sup>                         |                      |
|                                       | $X_{PiHt}$                                          | H <sup>+</sup> /Pi <sup>-</sup> cotransport activity                         | $3.850 \times 10^5$                        | mol s <sup>-1</sup> M <sup>-1</sup> (l mito) <sup>-1</sup>                  | [7,41] <sup>d</sup>                         |                      |
|                                       | $k_{PiHt}$                                          | H <sup>+</sup> /Pi <sup>-</sup> cotransport parameter                        | 0.2542                                     | mM                                                                          | [7,41] <sup>d</sup>                         |                      |
|                                       | $X_{KH}$                                            | K <sup>+</sup> /H <sup>+</sup> antiporter activity                           | $5.651 \times 10^7$                        | mol s <sup>-1</sup> M <sup>-2</sup> (l mito) <sup>-1</sup>                  | [7,41] <sup>d</sup>                         |                      |
|                                       | $X_{Hle}$                                           | Proton leak activity                                                         | 200.00                                     | mol s <sup>-1</sup> M <sup>-1</sup> mV <sup>-1</sup> (l mito) <sup>-1</sup> | [7,41] <sup>d</sup>                         |                      |
|                                       | $k_{Pi,3}$                                          | Complex III/Pi parameter                                                     | 0.3601                                     | mM                                                                          | [7,41] <sup>d</sup>                         |                      |
|                                       | $k_{Pi,4}$                                          | Complex III/Pi parameter                                                     | 5.924                                      | mM                                                                          | [7,41] <sup>d</sup>                         |                      |
|                                       | $n_A$                                               | H <sup>+</sup> stoich. coefficient for F <sub>0</sub> F <sub>1</sub> -ATPase | 3                                          | unitless                                                                    | [51]                                        |                      |
|                                       | $p_{Pi}$                                            | Mitochondrial membrane permeability to Pi                                    | 327                                        | μm s <sup>-1</sup>                                                          | [20]                                        |                      |
|                                       | $p_A$                                               | Mitochondrial outer membrane permeability to nucleotides                     | 85.0                                       | μm s <sup>-1</sup>                                                          | [52]                                        |                      |
|                                       | <b>Fixed concentrations and concentration pools</b> | $k_{m,ADP}$                                                                  | ANT Michaelis-Menten constant              | $3.5 \times 10^{-6}$                                                        | M                                           | [20,53] <sup>e</sup> |
|                                       |                                                     | $k_{O2}$                                                                     | Kinetic constant for Complex IV            | $1.2 \times 10^{-4}$                                                        | M                                           | [20,53] <sup>e</sup> |
|                                       |                                                     | $\beta$                                                                      | Matrix buffering capacity                  | 0.01                                                                        | M                                           | [20,53] <sup>e</sup> |
|                                       |                                                     | $C_{IM}$                                                                     | Capacitance of inner membrane              | $6.75 \times 10^{-6}$                                                       | mol (l mito) <sup>-1</sup> mV <sup>-1</sup> | [7,54]               |
|                                       |                                                     | $NAD_{tot}$                                                                  | Total matrix NAD(H) concentration          | 2.97                                                                        | mol (l matrix water) <sup>-1</sup>          | [20,53] <sup>e</sup> |
| $Q_{tot}$                             |                                                     | Total matrix ubiquinol concentration                                         | 1.35                                       | mol (l matrix water) <sup>-1</sup>                                          | [20,53] <sup>e</sup>                        |                      |
| <b>Binding constants</b>              | $cytC_{tot}$                                        | Total IM cytochrome c concentration                                          | 2.70                                       | mol (l IM water) <sup>-1</sup>                                              | [20,53] <sup>e</sup>                        |                      |
|                                       | $A_{tot}$                                           | Total matrix ATP + ADP concentration                                         | 10                                         | mol (l matrix water) <sup>-1</sup>                                          | [20,53] <sup>e</sup>                        |                      |
|                                       | $TPP$                                               | Total phosphate pool (see text)                                              | $12^{-18}$                                 | mmol (l cell) <sup>-1</sup>                                                 | -                                           |                      |
|                                       | $[H^+]_c$                                           | Cytoplasm H <sup>+</sup> ion concentration                                   | $10^{-7.1}$                                | mol (l cytoplasm water) <sup>-1</sup>                                       |                                             |                      |
|                                       | $[K^+]_c$                                           | Cytoplasm K <sup>+</sup> ion concentration                                   | 150                                        | mol (l cytoplasm water) <sup>-1</sup>                                       |                                             |                      |
|                                       | $CR_{tot}$                                          | Total Cr + CrP concentration                                                 | 40.14                                      | mol (l cytoplasm water) <sup>-1</sup>                                       | [5] <sup>f</sup>                            |                      |
| <b>Binding constants</b>              | $K_{AK}$                                            | Adenylate kinase equilibrium constant                                        | 0.4331                                     | unitless                                                                    | [50] <sup>c</sup>                           |                      |
|                                       | $K_{CK}$                                            | Creatine kinase equilibrium constant                                         | $1.66 \times 10^9$                         | M <sup>-1</sup>                                                             | [55]                                        |                      |
|                                       | $K_{Mg-ATP}$                                        | Mg-ATP binding constant                                                      | $24 \times 10^{-6}$                        | M                                                                           | [56]                                        |                      |
|                                       | $K_{Mg-ADP}$                                        | Mg-ADP binding constant                                                      | $347 \times 10^{-6}$                       | M                                                                           | [56]                                        |                      |
|                                       | $X_{AK}$                                            | Adenylate kinase activity                                                    | $1 \times 10^7$                            | M s <sup>-1</sup> M <sup>-2</sup>                                           | -                                           |                      |

Table 3. Continued

| Category | Parameter | Description                                                | Value                 | Units                     | Reference |
|----------|-----------|------------------------------------------------------------|-----------------------|---------------------------|-----------|
|          | $X_{CK}$  | Creatine kinase activity                                   | $1 \times 10^7$       | $M \text{ s}^{-1} M^{-2}$ | –         |
|          | $X_{MgA}$ | $Mg^{2+}$ binding activity                                 | $1 \times 10^7$       | $M \text{ s}^{-1} M^{-2}$ | –         |
|          | $k_{dH}$  | H <sub>2</sub> PO <sub>4</sub> –proton dissociate constant | $1.78 \times 10^{-7}$ | M                         | [50]      |

<sup>a</sup>Value is within range of standard values used for dog heart found in cited references.

<sup>b</sup>Standard physicochemical constants.

<sup>c</sup>Computed from thermodynamic data tabulated in cited reference.

<sup>d</sup>Value set by fitting the data in cited references; see text for explanation.

<sup>e</sup>Value used is taken from previous modeling studies, not direct experimental measure.

<sup>f</sup>Value is computed from  $[27.3 \text{ mmol (l cell water)}^{-1}] \times [1.4703 \text{ l cell (l cytoplasm)}^{-1}]$ .

DOI: 10.1371/journal.pcbi.0020107.t003

$F_0F_1$ -ATPase flux:

$$J_{F1} = X_{F1} \left( e^{-(\Delta G_{0,ATP} - n_A \Delta G_H)/RT} \frac{K_{Mg-ADP}}{K_{Mg-ATP}} [mADP]_x [Pi]_x - (1M) [mATP]_x \right). \quad (15)$$

Magnesium binding fluxes:

$$\begin{aligned} J_{MgATPx} &= X_{MgA} ([fATP]_x [Mg^{2+}]_x - K_{Mg-ATP} [mATP]_x) \\ J_{MgADPx} &= X_{MgA} ([fADP]_x [Mg^{2+}]_x - K_{Mg-ADP} [mADP]_x) \\ J_{MgATPi} &= X_{MgA} ([fATP]_i [Mg^{2+}]_i - K_{Mg-ATP} [mATP]_i) \\ J_{MgADPi} &= X_{MgA} ([fADP]_i [Mg^{2+}]_i - K_{Mg-ADP} [mADP]_i) \end{aligned} \quad (16)$$

where  $[fATP]_x$ ,  $[fADP]_x$ ,  $[fATP]_i$ , and  $[fADP]_i$  denote magnesium unbound ATP in the matrix, ADP in the matrix, ATP in the IM space, and ADP in the IM space, respectively.

Substrate transport fluxes:

$$\begin{aligned} J_{ATPi} &= \gamma p_A ([ATP]_c - [ATP]_i) \\ J_{ADPi} &= \gamma p_A ([ADP]_c - [ADP]_i) \\ J_{AMPi} &= \gamma p_A ([AMP]_c - [AMP]_i) \\ J_{PiH} &= \gamma p_{Pi} ([Pi]_c - [Pi]_i) \end{aligned} \quad (17)$$

Adenine nucleotide translocase (ANT) flux:

$$\begin{aligned} J_{ANT} &= X_{ANT} \\ &\left( \frac{[fADP]_i}{[fADP]_i + [fATP]_i e^{-0.35F\Delta\Psi/RT}} - \frac{[fADP]_x}{[fADP]_x + [fATP]_x e^{-0.65F\Delta\Psi/RT}} \right) \\ &\left( \frac{1}{1 + k_{m,ADP}/[fADP]_i} \right). \end{aligned} \quad (18)$$

The phosphate–hydrogen cotransporter flux:

$$J_{PiHt} = X_{PiHt} \left( \frac{[H_2PO_4^-]_i [H^+]_c - [H_2PO_4^-]_x [H^+]_x}{[H_2PO_4^-]_i + k_{PiHt}} \right), \quad (19)$$

where  $[H_2PO_4^-]_i = [H^+]_i [Pi]_i / ([H^+]_i + k_{dH})$  and  $[H_2PO_4^-]_x = [H^+]_x [Pi]_x / ([H^+]_x + k_{dH})$ .

Mitochondrial adenylate kinase flux:

$$J_{AKi} = X_{AK} (K_{AK} [ADP]_i [ADP]_i - [AMP]_i [ATP]_i). \quad (20)$$

Proton leak flux:

$$J_{Hlc} = X_{Hlc} \Delta\Psi \left( \frac{[H^+]_c e^{+F\Delta\Psi/RT} - [H^+]_x}{e^{+F\Delta\Psi/RT} - 1} \right). \quad (21)$$

Potassium–hydrogen ion exchange:

$$J_{KH} = X_{KH} ([K^+]_c [H^+]_x - [K^+]_x [H^+]_c). \quad (22)$$

The above expressions for the mitochondrial model fluxes are identical to those presented in [7], with the exception of the Complex I and III fluxes, which have been modified to ensure that the model remains numerically stable when  $[O_2]$  and  $[Q]$  reach 0.

**Mathematical expressions for cytoplasmic reaction fluxes.** Four biochemical processes are modeled in the cytoplasm—the adenylate

kinase reaction, the creatine kinase reaction, ATP hydrolysis, and binding of magnesium ions to ADP and ATP.

The binding of magnesium to ATP and ADP in the cytoplasm takes the same form as the binding fluxes in the mitochondria:

$$\begin{aligned} J_{MgATPc} &= X_{MgA} ([fATP]_c [Mg^{2+}]_c - K_{Mg-ATP} [mATP]_c) \\ J_{MgADPc} &= X_{MgA} ([fADP]_c [Mg^{2+}]_c - K_{Mg-ADP} [mADP]_c) \end{aligned} \quad (23)$$

where  $[fATP]_c$  and  $[fADP]_c$  denote magnesium unbound ATP and ADP in the cytoplasm. Similarly, the cytoplasmic adenylate kinase is analogous to the mitochondrial reaction.

$$J_{AKc} = X_{AK} (K_{AK} [ADP]_c [ADP]_c - [AMP]_c [ATP]_c) \quad (24)$$

In Equation 24,  $K_{AK}$  is the equilibrium constant for the reaction  $2 \text{ ADP} \rightarrow \text{ATP} + \text{AMP}$ , and  $X_{AK}$  is the enzyme activity, which is set to a large enough value so that the reaction is effectively maintained in equilibrium.

The creatine kinase flux is modeled using the expression:

$$J_{CKc} = X_{CK} (K_{CK} [ADP]_c [CrP]_c [H^+]_c - [ATP]_c [Cr]_c), \quad (25)$$

where the activity  $X_{CK}$  is set to a large enough value so that the equilibrium  $K_{CK} = ([ATP]_c [Cr]_c / [ADP]_c [CrP]_c [H^+]_c)_{eq}$  is maintained during simulations.

The flux  $J_{AKc}$  is defined as the flux through the reaction  $\text{ATP} \rightarrow \text{ADP} + \text{Pi}$ . Mathematical models for the ATP consumption flux are considered in the Results section.

**Parameter values.** With the exception of one adjustable parameter, all parameters in the model are fixed at values justified by previous studies. The adjustable parameter is the total pool of exchangeable phosphate in the cell, which is a constant denoted by  $TPP$ . The total exchangeable phosphate pool is computed as

$$\begin{aligned} TPP &= [V_{\text{cyto}} W_c (2[ATP]_c + [ADP]_c + [Pi]_c + [CrP]_c) \\ &+ V_{\text{mito}} W_i (2[ATP]_i + [ADP]_i + [Pi]_i) \\ &+ V_{\text{mito}} W_x ([ATP]_x + [Pi]_x)] / V_{\text{cell}} \end{aligned} \quad (26)$$

where  $V_{\text{cyto}} = 0.472 \text{ ml (g of tissue)}^{-1}$ ,  $V_{\text{mito}} = 0.200 \text{ ml (g of tissue)}^{-1}$ , and  $V_{\text{cell}} = 0.694 \text{ ml (g of tissue)}^{-1}$  are the volume densities of cytoplasm, mitochondria, and total cell space in cardiac tissue [37]. By comparing simulation predictions with experimental data (see Results section), a value of  $TPP = 15 \text{ mM}$  is chosen as the value most consistent with the experimental observations.

The parameter values listed in Table 3 are organized into oxygen transport parameters, structure/volume parameters, physicochemical parameters, mitochondrial model parameters, fixed concentration pools, and binding constants.

The oxygen transport parameters, including solubilities, permeabilities, and oxyhemoglobin and oxymyoglobin binding parameters, are obtained from the literature, as indicated in the table. The effective permeability–surface area product for the capillary wall is obtained by converting the mass transfer coefficient reported in [38] and used in [39] to the corresponding  $PS$  product. Similarly, the structure/volume parameters are available from experimental estimations published in the literature. The effective capillary length is set to the mean capillary path length for left ventricular tissue reported by Kassab and Fung [40]. The majority of the volume density and water space measurements are obtained from the study of

Vinnakota and Bassingthwaighte [37]. Values of the mitochondrial model parameters are estimated and reported in [7].

Oxidative phosphorylation model parameters have been adjusted to account for modifications from [7], as indicated in the table. Since the  $F_0F_1$ -ATPase reaction is maintained near chemical equilibrium in the model parameterization that was published in [7], here the  $F_0F_1$ -ATPase activity  $X_{F1}$  is set to the arbitrarily high value of  $1,000 \text{ mol s}^{-1} \text{ M}^{-1} (\text{l mito})^{-1}$ . In addition, the updates to the functional forms for the Complex I and III fluxes require estimation of values for the activities of  $X_{C1}$  and  $X_{C3}$ . To account for these changes, the full set of mitochondrial model parameters has been refined by repeating the fits to data from isolated mitochondrial function of Beard [7]. The agreement between the data of Bose et al. [41] and the updated model is equivalent to that reported for the previous version of the model [7].

All values for concentrations of pooled metabolites are set according to values reported in previous studies, with the exception of the total pool of exchangeable phosphate (TPP), which is estimated in the Results section. Binding constants are obtained from the literature; enzyme activities for reactions maintained near equilibrium are set to arbitrarily high values.

**Computational methods.** The model was coded using MATLAB; multiple steady-state solutions were obtained using the Matlab

Distributed Computing Toolbox on 25-node cluster (50-CPU AMD Opteron-based server HP DL145 G2 with dual 2.6-GHz processors). Obtaining a single steady-state solution requires approximately 30 min of computing time on a single processor. A total of 150 steady-state solutions are computed to construct Figure 4, requiring less than 2 h to complete using the cluster.

## Acknowledgments

The author thanks Dr. Jianyi Zhang for kindly providing raw data from the study published in [10] and Patrick Hannaert and François Guillaud for careful feedback on the mitochondrial model.

**Author contributions.** DAB conceived and designed the experiments, performed the experiments, analyzed the data, contributed reagents/materials/analysis tools, and wrote the paper.

**Funding.** This work was supported by the National Institutes of Health through grants HL072011 and EB005825.

**Competing interests.** The author has declared that no competing interests exist.

## References

- Neely JR, Denton RM, England PJ, Randle PJ (1972) The effects of increased heart work on the tricarboxylate cycle and its interactions with glycolysis in the perfused rat heart. *Biochem J* 128: 147–159.
- Balaban RS, Kantor HL, Katz LA, Briggs RW (1986) Relation between work and phosphate metabolite in the in vivo paced mammalian heart. *Science* 232: 1121–1123.
- Chance B, Williams GR (1956) The respiratory chain and oxidative phosphorylation. *Adv Enzymol Relat Subj Biochem* 17: 65–134.
- Chance B (1965) Reaction of oxygen with the respiratory chain in cells and tissues. *J Gen Physiol* 49 (Supplement): 163–195.
- Katz LA, Swain JA, Portman MA, Balaban RS (1989) Relation between phosphate metabolites and oxygen consumption of heart in vivo. *Am J Physiol* 256: H265–H274.
- Ingwall JS, Weiss RG (2004) Is the failing heart energy starved? On using chemical energy to support cardiac function. *Circ Res* 95: 135–145.
- Beard DA (2005) A biophysical model of the mitochondrial respiratory system and oxidative phosphorylation. *PLoS Comput Biol* 1: e36. DOI: 10.1371/journal.pcbi.0010036
- Bassingthwaighte JB, Goresky CA (1984) Modeling in the analysis of solute and water exchange in the microvasculature. In: Renkin EM, Michel CC, editors. *Handbook of physiology. Section 2. The cardiovascular system, Volume IV, The microcirculation.* Bethesda (Maryland): American Physiological Society. pp. 549–626.
- Portman MA, Heineman FW, Balaban RS (1989) Developmental changes in the relation between phosphate metabolites and oxygen consumption in the sheep heart in vivo. *J Clin Invest* 83: 456–464.
- Zhang J, Ugurbil K, From AH, Bache RJ (2001) Myocardial oxygenation and high-energy phosphate levels during graded coronary hypoperfusion. *Am J Physiol Heart Circ Physiol* 280: H318–H326.
- Bassingthwaighte JB, Goresky CA, Linehan J, editors (1998) *Whole organ approaches to cellular metabolism: Permeation, cellular uptake, and product formation.* New York: Springer. 575 p.
- Gorman MW, Tune JD, Richmond KN, Feigl EO (2000) Feedforward sympathetic coronary vasodilation in exercising dogs. *J Appl Physiol* 89: 1892–1902.
- Tune JD, Richmond KN, Gorman MW, Olsson RA, Feigl EO (2000) Adenosine is not responsible for local metabolic control of coronary blood flow in dogs during exercise. *Am J Physiol Heart Circ Physiol* 278: H74–H84.
- Zhang J, Murakami Y, Zhang Y, Cho YK, Ye Y, et al. (1999) Oxygen delivery does not limit cardiac performance during high work states. *Am J Physiol* 277: H50–H57.
- Garlick PB, Townsend RM (1992) NMR visibility of Pi in perfused rat hearts is affected by changes in substrate and contractility. *Am J Physiol* 263: H497–H502.
- Humphrey SM, Garlick PB (1991) NMR-visible ATP and Pi in normoxic and reperfused rat hearts: A quantitative study. *Am J Physiol* 260: H6–H12.
- Townsend RM, Garlick PB (1991) NMR visibility of ATP, PCr, and Pi in the rat heart: Effects of perfusion conditions. *Biochem Soc Trans* 19: 209S.
- Korzeniewski B, Noma A, Matsuoka S (2005) Regulation of oxidative phosphorylation in intact mammalian heart in vivo. *Biophys Chem* 116: 145–157.
- Saks VA, Kongas O, Vendelin M, Kay L (2000) Role of the creatine/phosphocreatine system in the regulation of mitochondrial respiration. *Acta Physiol Scand* 168: 635–641.
- Vendelin M, Kongas O, Saks V (2000) Regulation of mitochondrial respiration in heart cells analyzed by reaction-diffusion model of energy transfer. *Am J Physiol* 278: C747–C764.
- Aliev MK, Saks VA (1997) Compartmentalized energy transfer in cardiomyocytes: Use of mathematical modeling for analysis of in vivo regulation of respiration. *Biophys J* 73: 428–445.
- Saks VA, Khuchua ZA, Vasilyeva EV, Belikova O, Kuznetsov AV (1994) Metabolic compartmentation and substrate channelling in muscle cells. Role of coupled creatine kinases in in vivo regulation of cellular respiration—A synthesis. *Mol Cell Biochem* 133/134: 155–192.
- Vendelin M, Lemba M, Saks VA (2004) Analysis of functional coupling: Mitochondrial creatine kinase and adenine nucleotide translocase. *Biophys J* 87: 696–713.
- Jenerson JA, Wiseman RW, Westerhoff HV, Kushmerick MJ (1996) The signal transduction function for oxidative phosphorylation is at least second order in ADP. *J Biol Chem* 271: 27995–27998.
- Jenerson JA, Westerhoff HV, Kushmerick MJ (2000) A metabolic control analysis of kinetic controls in ATP free-energy metabolism in contracting skeletal muscle. *Am J Physiol* 279: C813–C832.
- Cortassa S, Aon MA, Marban E, Winslow RL, O'Rourke B (2003) An integrated model of cardiac mitochondrial energy metabolism and calcium dynamics. *Biophys J* 84: 2734–2755.
- Jafri MS, Dudycha SJ, O'Rourke B (2001) Cardiac energy metabolism: Models of cellular respiration. *Annu Rev Biomed Eng* 3: 57–81.
- Nguyen MHT, Ramay HR, Dudycha SJ, Jafri MS (2004) Modeling the cellular basis of cardiac excitation-contraction coupling and energy metabolism. *Recent Res Dev Biophys* 3: 125–145.
- Dudycha SJ (2000) A detailed model of the tricarboxylic acid cycle in heart cells [MS thesis]. Baltimore: The Johns Hopkins University. 141 p.
- Beard DA, Schenkman KA, Feigl EO (2003) Myocardial oxygenation in isolated hearts predicted by an anatomically realistic microvascular transport model. *Am J Physiol* 285: H1826–H1836.
- Schenkman KA, Beard DA, Ciesielski WA, Feigl EO (2003) Comparison of buffer and red blood cell perfusion of guinea pig heart oxygenation. *Am J Physiol* 285: H1819–H1825.
- Bassingthwaighte JB, Beard DA, Li Z (2001) The mechanical and metabolic basis of myocardial blood flow heterogeneity. *Basic Res Cardiol* 96: 582–594.
- Gonzalez F, Bassingthwaighte JB (1990) Heterogeneities in regional volumes of distribution and flows in rabbit heart. *Am J Physiol* 258: H1012–H1024.
- Bassingthwaighte JB, Malone MA, Moffett TC, King RB, Chan IS, et al. (1990) Molecular and particulate depositions for regional myocardial flows in sheep. *Circ Res* 66: 1328–1344.
- Bassingthwaighte JB, Li Z (1999) Heterogeneities in myocardial flow and metabolism: Exacerbation with abnormal excitation. *Am J Cardiol* 83: 7H–12H.
- Caldwell JH, Martin GV, Raymond GM, Bassingthwaighte JB (1994) Regional myocardial flow and capillary permeability-surface area products are nearly proportional. *Am J Physiol* 267: H654–H666.
- Vinnakota KC, Bassingthwaighte JB (2004) Myocardial density and composition: A basis for calculating intracellular metabolite concentrations. *Am J Physiol* 286: H1742–H1749.
- Hellums JD, Nair PK, Huang NS, Ohshima N (1996) Simulation of intraluminal gas transport processes in the microcirculation. *Ann Biomed Eng* 24: 1–24.
- McGuire BJ, Secomb TW (2001) A theoretical model for oxygen transport in skeletal muscle under conditions of high oxygen demand. *J Appl Physiol* 91: 2255–2265.
- Kassab GS, Fung YC (1994) Topology and dimensions of pig coronary capillary network. *Am J Physiol* 267: H319–H325.
- Bose S, French S, Evans FJ, Joubert F, Balaban RS (2003) Metabolic network

- control of oxidative phosphorylation: Multiple roles of inorganic phosphate. *J Biol Chem* 278: 39155–39165.
42. Altman PL Federation of American Societies for Experimental Biology, Committee on Biological Handbooks, Katz DDUS National Research Council, Committee on the Handbook of Biological Data (1971) *Respiration and circulation*. Bethesda (Maryland): Federation of American Societies for Experimental Biology. 930 p.
  43. Christoforides C, Laasberg LH, Hedley-Whyte J (1969) Effect of temperature on solubility of O<sub>2</sub> in human plasma. *J Appl Physiol* 26: 56–60.
  44. Mahler M, Louy C, Homsher E, Peskoff A (1985) Reappraisal of diffusion, solubility, and consumption of oxygen in frog skeletal muscle, with applications to muscle energy balance. *J Gen Physiol* 86: 105–134.
  45. Beard DA, Bassingthwaighe JB (2000) Advection and diffusion of substances in biological tissues with complex vascular networks. *Ann Biomed Eng* 28: 253–268.
  46. Pagel PS, Hettrick DA, Montgomery MW, Kersten JR, Steffen RP, et al. (1998) RSR13, a synthetic modifier of hemoglobin–oxygen affinity, enhances the recovery of stunned myocardium in anesthetized dogs. *J Pharmacol Exp Ther* 285: 1–8.
  47. Schenkman KA, Marble DR, Burns DH, Feigl EO (1997) Myoglobin oxygen dissociation by multiwavelength spectroscopy. *J Appl Physiol* 82: 86–92.
  48. Deussen A, Bassingthwaighe JB (1996) Modeling [<sup>15</sup>O]oxygen tracer data for estimating oxygen consumption. *Am J Physiol* 270: H1115–H1130.
  49. Munoz DR, de Almeida M, Lopes EA, Iwamura ES (1999) Potential definition of the time of death from autolytic myocardial cells: A morphometric study. *Forensic Sci Int* 104: 81–89.
  50. Alberty RA (2003) *Thermodynamics of biochemical reactions*. Hoboken (New Jersey): John Wiley.
  51. Tomashek JJ, Brusilow WS (2000) Stoichiometry of energy coupling by proton-translocating ATPases: A history of variability. *J Bioenerg Biomembr* 32: 493–500.
  52. Lee AC, Zizi M, Colombini M (1994) Beta-NADH decreases the permeability of the mitochondrial outer membrane to ADP by a factor of 6. *J Biol Chem* 269: 30974–30980.
  53. Korzeniewski B, Zoladz JA (2001) A model of oxidative phosphorylation in mammalian skeletal muscle. *Biophys Chem* 92: 17–34.
  54. Gentet LJ, Stuart GJ, Clements JD (2000) Direct measurement of specific membrane capacitance in neurons. *Biophys J* 79: 314–320.
  55. Veech RL, Lawson JW, Cornell NW, Krebs HA (1979) Cytosolic phosphorylation potential. *J Biol Chem* 254: 6538–6547.
  56. Korzeniewski B (2001) Theoretical studies on the regulation of oxidative phosphorylation in intact tissues. *Biochim Biophys Acta* 1504: 31–45.
